# Supplementary material for: Transcriptome sequencing and comparative analysis of adult ovary and testis identify potential gonadal maintenance-related genes in Mauremys reevesii with temperature-dependent sex determination
Source: PeerJ journal article supplement (doi:10.7717/peerj.6557), 2019-03-08

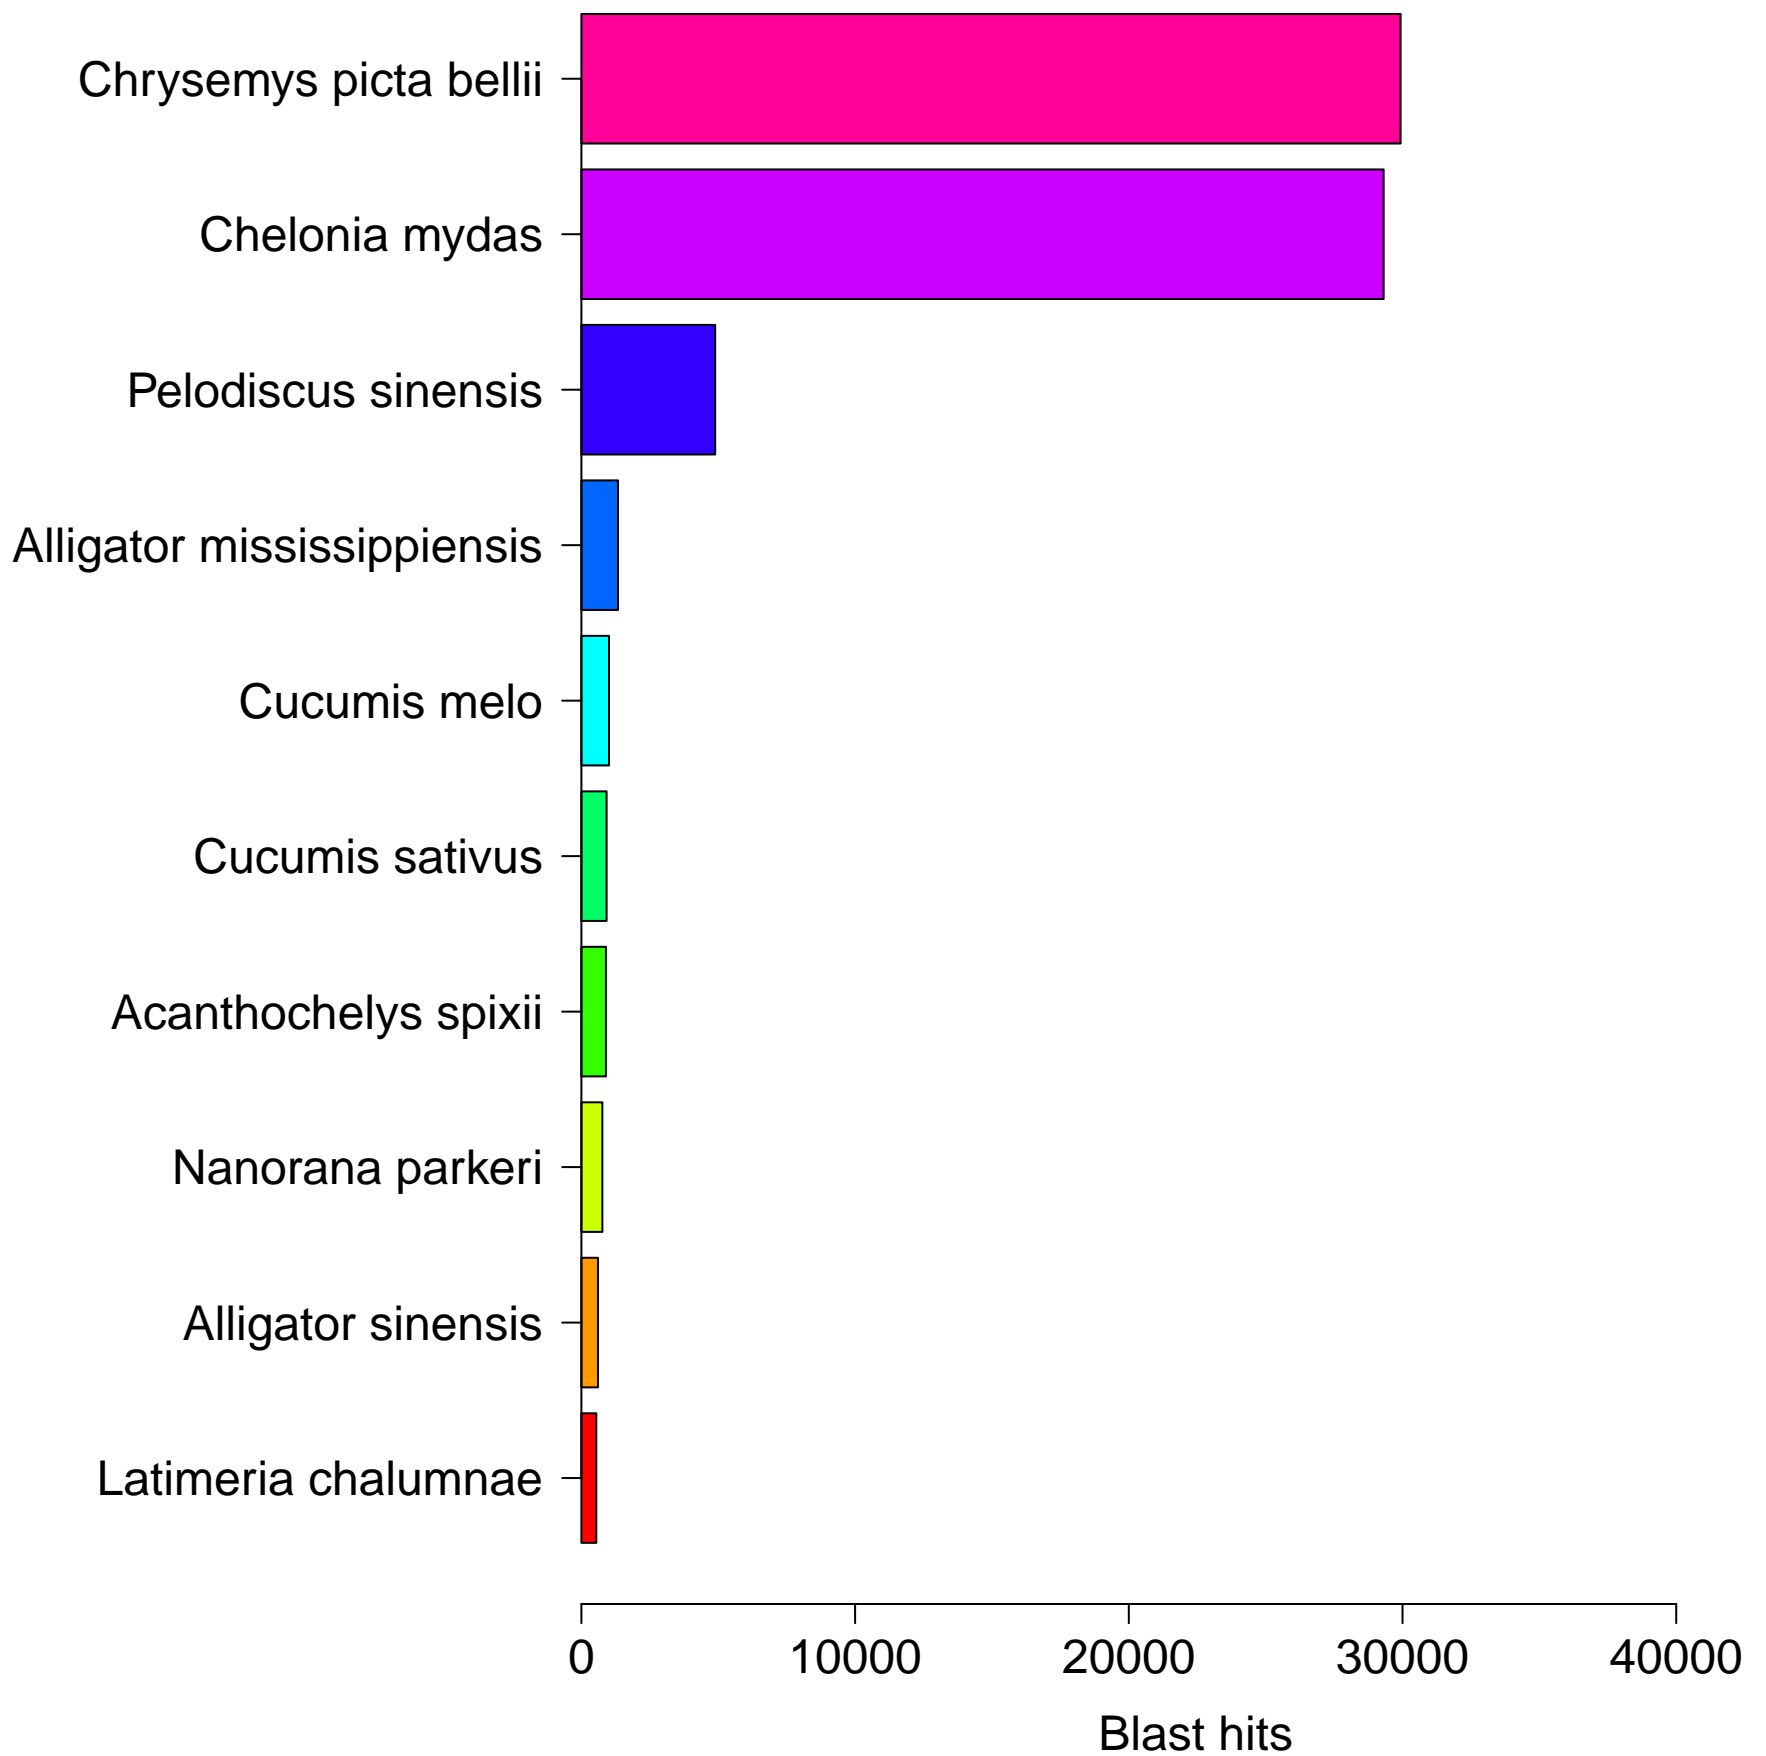

Supplement: Figure_S1.pdf [file Figure_S1.pdf]
