# Supplementary material for: Transcriptome sequencing and comparative analysis of adult ovary and testis identify potential gonadal maintenance-related genes in Mauremys reevesii with temperature-dependent sex determination
Source: PeerJ. 2019 Mar 8;7:e6557. doi: 10.7717/peerj.6557 (PMC6410691; doi:10.7717/peerj.6557)
Supplement: Supplemental Information 2 — Testis: Male 1, Male 2, Male 3; Ovary: Female 1, Female 2, Female 3. [file peerj-07-6557-s002.xlsx]

## Sheet: Sheet1
Sample	Male 1	Male 2	Male 3	Female 1	Female 2	Female 3	Total
Raw reads	81369826	71156674	69466956	50354874	124062604	112374346	508785280
Raw bases,Mbp	12205	10673	10420	7553	18609	16856	76316
Trim reads	79459524	69492528	67807520	49205254	121068366	109130658	496163850
Trim bases,Mbp	11591	10124	9889	7161	17668	15969	72402
Average length	145.88	145.69	145.84	145.54	145.94	146.33	145.87
Trim reads, %	97.65	97.66	97.61	97.72	97.59	97.11	97.57
Trim bases, %	94.97	94.86	94.91	94.81	94.94	94.74	94.87
