# Supplementary material for: Transcriptome sequencing and comparative analysis of adult ovary and testis identify potential gonadal maintenance-related genes in Mauremys reevesii with temperature-dependent sex determination
Source: PeerJ. 2019 Mar 8;7:e6557. doi: 10.7717/peerj.6557 (PMC6410691; doi:10.7717/peerj.6557)
Supplement: Supplemental Information 3 — Testis_ average: the average gene expression values of three testis biological replicates; Ovary_ average: the average gene expression values of three testis biological replicates; log2Fold Change: the relative expression level of genes in ovary compared to that in testis (log2 transformation); Q value: corrected P value. [file peerj-07-6557-s003.xlsx]

## Sheet: Sheet1
Gene name	Ensembl ID	Description	Testis_ average	Ovary_ average	log2Fold Change	Q value
CYP19A1	TR102156|c1_g2_i2	Aromatase	3.94	492.55	6.64	0.00458
FOXL2	TR138024|c0_g1_i2	Forkhead box protein L2	0.52	660.25	8.77	0.000286
AMH	TR109517|c0_g1_i1	Anti-Müllerian hormone	1526.67	51.75	-4.86	0.0444
GDF9	TR148262|c0_g3_i1	Growth/differentiation factor 9	21.29	11568.9	9.02	0.000445
FGF9	TR108256|c0_g1_i4	Fibroblast growth factor 9	9.79	442.85	5.36	0.0225
SMAD9	TR137938|c0_g1_i2	Mothers against decapentaplegic homolog 9	10.3	339.08	4.91	0.0353
WNT4	TR167755|c2_g1_i1	wingless-related MMTV integration site 4	105.49	7614.18	6.16	0.00714
SOX9	TR144387|c0_g2_i1	Transcription factor SOX-9	1637.35	54.36	-4.89	0.0405
AR	TR166731|c0_g1_i3	Androgen receptor	32.95	0.26	-4.75	0.0437
