# Supplementary material for: Transcriptome sequencing and comparative analysis of adult ovary and testis identify potential gonadal maintenance-related genes in Mauremys reevesii with temperature-dependent sex determination
Source: PeerJ. 2019 Mar 8;7:e6557. doi: 10.7717/peerj.6557 (PMC6410691; doi:10.7717/peerj.6557)
Supplement: Supplemental Information 4 [file peerj-07-6557-s004.xlsx]

## Sheet: Sheet1
Primer name	Forward primer (5’-3’)	Reverse primer (5’-3’)	Product (bp)	PCR efficiency (%)	R2
SOX9	GCATGAGCGAGGTTCACTCT	CCTTCTCGCTTCAGGTCTTG	136	100.2	0.99
AMH	AGAGGGAAACAACGAGCCAG	GTCACGACGTACCCCAACAT	172	99.7	0.99
AR	AAAGGATGGGATTCGCTGGC	GAACAGGCTCTGGAACGCT	226	100.5	0.99
PTH2R	CCATGGCACAGGTGGATTCT	GTTCGGTTCAAACCCTGCAC	289	101.6	0.98
CKAP5	AGGCGAGGCTGTTCCATAAC	TGACTCACAAAGCCCAGTCC	223	96	0.99
ARHGEF9	TGGAGGAGAAACTGCGATGG	GGAGGAACCGACCTGGAGTA	169	99.8	0.99
WNT4	CCAGTCAGTGGGAGTTCGTC	GTGCCACCGAGTGGTAGAAA	359	103.2	0.98
GDF9	TGCTTGCACTCAGCAAAAGG	GGAAGGTGAGTCCCCAAGAC	159	100.5	0.99
SMAD9	GCGAGCAACTGAGCAAAGAG	TGCAGAATGCGTGAGTGACA	147	104.9	0.99
CYP19A1	GCACACGAGGAGGAGTATGG	GGGGTTGCAAGGTACCGATT	201	100.4	0.99
FOXL2	ACGGTGGCTCCTCTTTTCAG	GCGTTTGGCTTGATAACGGG	193	98.6	0.99
FGF9	AGCCGACTGCATACAGAGAC	TGGGAGCACAGAAAAGTCATGT	211	99.9	0.99
GADPH	GTCACCAGAGCTGCCTTCA	CGACCGTGAGTGGAGTCATA	192	100.1	0.99
