# Supplementary material for: Transcriptome sequencing and comparative analysis of adult ovary and testis identify potential gonadal maintenance-related genes in Mauremys reevesii with temperature-dependent sex determination
Source: PeerJ. 2019 Mar 8;7:e6557. doi: 10.7717/peerj.6557 (PMC6410691; doi:10.7717/peerj.6557)
Supplement: Supplemental Information 5 [file peerj-07-6557-s005.xlsx]

## Sheet: Sheet1
Feature	Number of Unigenes	Pertentage(%)
Annotated in SwissProt	43727	9.99
Annotated in Nt	167417	38.24
Annotated in Nr	87918	20.08
Annotated in KOG	17127	3.91
Annotated in KEGG	12456	2.85
Annotated in Interpro	23441	5.35
Annotated in GO	41693	9.52
Annotated in all databases	4952	1.13
Annotated in any databases	188633	43.09
Total Unigenes	437767	100
