# Supplementary material for: Transcriptome sequencing and comparative analysis of adult ovary and testis identify potential gonadal maintenance-related genes in Mauremys reevesii with temperature-dependent sex determination
Source: PeerJ. 2019 Mar 8;7:e6557. doi: 10.7717/peerj.6557 (PMC6410691; doi:10.7717/peerj.6557)
Supplement: Supplemental Information 6 — Q value: corrected P value. [file peerj-07-6557-s006.xlsx]

## Sheet: Sheet1
Ensembl ID	Description	Testis_baseMean	Ovary_baseMean	Log2FC(F/M)	Qvalue
TR113107|c0_g1_i1	ccdc176	1184.22	29.0488	-5.30171	0.0275911
TR129500|c1_g1_i5	STAC	11.8852	516.77	5.32853	0.026256
TR91151|c4_g2_i2	fam69b	1.29414	567.524	7.95313	0.000644968
TR138378|c3_g3_i1	SLC22A23	0.284937	34.0016	4.76765	0.0489935
TR91856|c1_g1_i1	CCDC64B	15.7928	628.776	5.22893	0.0292028
TR144094|c0_g2_i4	Srcrb4d	196.439	4.36103	-5.20275	0.0451614
TR153113|c0_g1_i2	d2hgdh	110.019	0	-6.79466	0.00747576
TR84856|c0_g1_i4	PLEKHG3	39.6175	1273.93	4.97217	0.0393681
TR120955|c0_g7_i1	tmem241	2.74466	755.412	7.65819	0.00135166
TR91796|c3_g1_i1	ppp2r2b	53.1674	2144.94	5.30804	0.0281052
TR169187|c0_g2_i1	PLAC8L1	237.923	0.284458	-7.53924	0.00131354
TR91703|c2_g2_i1	Prdm16	8.93176	479.431	5.59614	0.0147455
TR85781|c2_g2_i3	Obscn	377.138	0.284458	-8.20161	0.0310985
TR174057|c0_g1_i1	Hmcn2	22.1967	0	-4.53585	0.0486879
TR85868|c0_g4_i1	Gm996	91.5575	4268	5.5274	0.0186288
TR155983|c0_g1_i1	Actl10	12547.9	10.2646	-10.1215	0.00152553
TR149535|c4_g1_i2	Acnat1	13.3582	613.569	5.41963	0.0176653
TR174237|c0_g1_i5	Myh7b	1293.86	10.1032	-6.86568	0.00560538
TR126375|c1_g1_i1	Fsip2	914.254	1.60547	-8.45649	0.000597214
TR144922|c0_g1_i1	Ttn	106.962	0.259138	-6.42195	0.0304258
TR51361|c0_g1_i1	HOXC10	1547.86	7.64198	-7.48563	0.00231473
TR174104|c2_g2_i2	Fbxl16	10.0742	1003.22	6.50272	0.00606293
TR171334|c0_g1_i1	SPRY4	7.3792	228.892	4.778	0.0430922
TR148890|c1_g1_i1	EXO5	9.14388	1508.83	7.21763	0.00306948
TR112886|c0_g1_i1	FAM83D	22.9666	3089.19	7.01053	0.0030901
TR174475|c0_g1_i5	LRRD1	1457.5	4.84172	-7.96387	0.00125082
TR90078|c0_g1_i1	CAPZA2	2264.1	7.88807	-7.99349	0.00116198
TR88974|c0_g2_i1	SNRPE	362.561	0.518276	-7.90362	0.00749057
TR97358|c1_g1_i1	METTL21B	77.862	3319.82	5.39607	0.0219461
TR121901|c0_g1_i1	GTF2IRD2	27.1604	0	-4.8156	0.0409921
TR166382|c0_g1_i1	nat8l	4.11767	817.874	7.32201	0.00221633
TR96620|c0_g1_i7	syt17	17.3514	1029.75	5.81167	0.0149522
TR126833|c0_g1_i2	MIP	106.927	1.38392	-5.50057	0.0210253
TR174858|c1_g1_i1	Ttll8	3407.19	17.3231	-7.5392	0.0304387
TR114742|c0_g1_i5	Ttll10	2569.18	13.1385	-7.5061	0.0016711
TR120651|c5_g1_i1	C5orf49	18829.1	24.6185	-9.52164	0.00231476
TR162795|c0_g1_i1	HSPA1L	29751.1	22.1533	-10.3276	0.000302141
TR144425|c0_g1_i4	SARG	41.4087	4557.24	6.74797	0.00496432
TR101254|c0_g1_i1	QtsA-14935	4907.41	5.94118	-9.46586	0.00415246
TR91216|c4_g6_i9	RGSL1	1525.01	13.7185	-6.69599	0.0208535
TR83312|c0_g3_i1	ACPP	0	101.699	6.68228	0.00249278
TR162272|c0_g1_i1	FAM221B	1761.35	1.90219	-9.24614	0.00688959
TR108860|c0_g1_i3	IQCA1P1	1422.48	7.04064	-7.4679	0.00250372
TR138762|c0_g1_i3	KIAA1875	771.809	6.98406	-6.59685	0.00713842
TR98837|c0_g1_i1	FANK1	669.256	15.9866	-5.30224	0.0328617
TR151571|c0_g1_i1	ARRDC5	1974.49	27.9125	-6.09438	0.0132505
TR97792|c0_g1_i4	SOWAHB	5.87765	6251.65	9.82834	0.000230584
TR131869|c0_g7_i2	MROH2A	195.017	1.34633	-6.38443	0.00936107
TR130896|c0_g1_i1	FAM187A	118.346	1.60547	-5.51746	0.0285874
TR91198|c1_g1_i1	C2orf71	16.9141	1000.36	5.80473	0.0181973
TR155680|c0_g1_i5	MROH6	3814.55	3.1508	-9.84429	0.000230892
TR160703|c0_g1_i1	C5orf52	4697.11	4.01644	-9.8712	0.0349227
TR162571|c0_g1_i2	SLC15A5	16.1797	2494.51	7.18249	0.00197604
TR103438|c0_g4_i2	IGHV4OR15-8	0.259098	48.0461	5.28368	0.0300493
TR174348|c0_g1_i2	UNCX	9.24386	4345.22	8.72886	0.000488626
TR166840|c1_g1_i1	SDR42E2	18885.2	162.585	-6.85114	0.005344
TR121211|c1_g2_i1	SLC22A31	5.07384	164.986	4.77231	0.0455774
TR102285|c0_g1_i1	LRRC37A	1861.99	3.59311	-8.66393	0.000493946
TR113353|c1_g1_i1	DBX1	776.104	2.9423	-7.62293	0.00169919
TR160668|c0_g1_i1	MARCH11	865.973	4.81046	-7.22119	0.00250318
TR112765|c0_g1_i1	IZUMO3	820.611	1.97815	-8.1079	0.0143797
TR120729|c0_g1_i11	ANO4	299.191	1.65611	-6.82043	0.00485997
TR126714|c6_g5_i12	FAM115C	2.89905	96.6912	4.64703	0.0451828
TR91785|c1_g2_i1	RERGL	19.65	587.429	4.83265	0.0406723
TR130344|c0_g2_i5	PRDM6	0	86.7166	6.45478	0.00351283
TR95365|c0_g1_i1	STPG1	1433.21	25.5542	-5.75517	0.0176034
TR84511|c2_g2_i3	FAM228B	12313.9	57.9471	-7.70677	0.00193266
TR120081|c0_g1_i1	CCDC42	2423.91	4.76576	-8.71621	0.000567147
TR127137|c3_g1_i1	Skor2	16.3415	1624.15	6.5502	0.00632199
TR149352|c0_g1_i1	CDC25A	169.006	6959	5.35543	0.0270557
TR91764|c1_g6_i2	SRRM4	93.8779	0.284458	-6.20684	0.00754563
TR144866|c4_g7_i3	A2ML1	362.977	10.2318	-5.01819	0.0361586
TR98808|c0_g1_i3	IQCF5	1570.6	1.37165	-9.37212	0.0116848
TR90481|c0_g1_i5	ARHGEF33	92.2898	1.00174	-5.5424	0.0170956
TR138101|c0_g2_i1	EFCAB9	3208.14	10.2927	-8.15065	0.000993525
TR127023|c0_g5_i1	fam166b	101.892	0.259138	-6.35255	0.0241404
TR148133|c0_g1_i2	tmem150b	3.21185	1155.82	8.10149	0.00101255
TR84872|c1_g2_i1	NLRP3	5.61922	250.956	5.25036	0.027077
TR157556|c0_g1_i2	srgap2	0	34.5504	5.15179	0.0247814
TR91860|c0_g1_i1	FHAD1	1938.94	27.7123	-6.0782	0.013477
TR91183|c8_g1_i3	FAM220BP	4685.7	108.794	-5.41571	0.0338445
TR88433|c0_g2_i1	Tmem8b	52.2867	0.717277	-4.95558	0.0333794
TR167773|c1_g1_i20	SLC4A3	343.66	9.13233	-5.08813	0.0439863
TR161221|c0_g1_i4	Fam229a	10521.2	22.4825	-8.80764	0.00837748
TR85051|c3_g1_i1	MYO9A	66.6574	0.259138	-5.74774	0.0122381
TR108734|c1_g1_i1	VWC2L	3.00376	547.525	7.09806	0.00263802
TR170022|c0_g1_i2	Ep300	2.61682	2442.12	9.39979	0.00124096
TR138204|c0_g1_i1	GPR39	22.0091	2278.65	6.63047	0.00487802
TR114699|c0_g1_i1	TMEM233	14.6047	433.954	4.80081	0.0490071
TR16632|c0_g2_i1	Syce3	2831.47	24.7043	-6.78391	0.00394172
TR89260|c0_g1_i2	Lrrc51	4113.17	37.7764	-6.72928	0.00651925
TR17331|c0_g1_i1	C21orf140	1126.26	0.951096	-9.17432	0.000749387
TR53258|c0_g1_i1	CMLKR1	49.6128	0.284458	-5.30027	0.0242644
TR126132|c1_g1_i1	DLC1	160.476	5659.43	5.13152	0.0308517
TR115241|c0_g1_i1	CDK14	0	82.5399	6.38439	0.00975958
TR98589|c0_g2_i1	C5orf58	24.1674	0	-4.65348	0.0386692
TR144490|c2_g6_i4	TMEM232	727.553	16.6485	-5.36742	0.0311573
TR84610|c0_g1_i1	TDRD5	205.853	6576.68	4.9909	0.0453358
TR128886|c0_g4_i1	Mroh2a	38.6315	0.259138	-4.97614	0.0424612
TR153646|c0_g2_i1	WEE2	129.411	10633.4	6.34952	0.00821941
TR89493|c1_g1_i1	MMS22L	1.55256	116.641	5.5263	0.0118947
TR106314|c0_g1_i1	TMEM190	5140.72	5.48937	-9.62996	0.000974443
TR96979|c5_g1_i1	Rnf212	1048.31	9.38276	-6.65911	0.00508664
TR109807|c0_g3_i1	MICAL3	0	28.6314	4.88905	0.034774
TR171398|c0_g1_i1	Ank3	1.34717	77.4438	5.06267	0.0489574
TR87040|c0_g1_i1	SMKR1	18959.3	415.904	-5.50712	0.0300283
TR109328|c1_g6_i1	ZP1	9.91644	4638.74	8.7314	0.000474547
TR155478|c3_g1_i1	bmb	14.8359	2460.54	7.28021	0.00222615
TR1789|c0_g1_i1	Pfn3	20581.6	15.2068	-10.3106	0.00022184
TR131822|c2_g1_i5	MASP2	7.74301	792.544	6.50404	0.00647139
TR168078|c4_g2_i3	SULT2B1	2223.16	9.06072	-7.78838	0.0012356
TR136886|c0_g3_i1	PSMD9	0	965.974	9.91733	0.00576787
TR120876|c1_g2_i1	EML1	2.17546	124.89	5.30905	0.0358523
TR97323|c0_g1_i2	LAD1	52.875	16486	8.2575	0.000759262
TR90993|c4_g2_i2	FAAH	10120.8	55.4626	-7.48595	0.00215685
TR166956|c0_g1_i1	CYR61	23.0706	2321.76	6.59242	0.00537855
TR149937|c9_g3_i1	CFDP2	2270.6	13.5222	-7.2893	0.00291921
TR109023|c1_g1_i4	MSX1	8.72637	2183.57	7.81123	0.0025864
TR217653|c0_g1_i1	Tecta	270.596	0	-8.08532	0.000485925
TR130586|c1_g2_i2	Rbpjl	1.83817	236.766	6.38844	0.00518228
TR119940|c0_g1_i1	Nrn1	0	55.3783	5.81707	0.00827965
TR146974|c1_g1_i1	Mal	25.484	921.342	5.12211	0.0367488
TR16252|c0_g1_i1	PTPN1	83209.9	802.442	-6.69443	0.0230442
TR148072|c0_g4_i1	DAD1	39.8444	0	-5.35207	0.0336197
TR160456|c0_g1_i1	HS3ST1	15.5357	1892.46	6.83929	0.00371166
TR133190|c0_g1_i2	RASGRF2	2.89905	685.775	7.46057	0.00126636
TR97395|c0_g1_i6	PPEF2	35.5774	1644.87	5.49175	0.0198761
TR170932|c0_g1_i1	BCKDK	28.7714	0	-4.89586	0.031483
TR114466|c0_g3_i2	LECT2	6066.27	63.2546	-6.5611	0.00816841
TR138565|c0_g1_i1	SLC27A2	363.622	6.74313	-5.55734	0.0206432
TR127226|c0_g1_i4	NACAD	529.012	31516.6	5.89399	0.00996869
TR91025|c0_g1_i1	Fdxr	4.78958	168.859	4.87474	0.0369733
TR97753|c3_g6_i7	DCLK1	14.162	1923.52	6.9879	0.00297697
TR137938|c0_g1_i2	SMAD9	10.3034	339.079	4.91104	0.0352995
TR89334|c1_g1_i1	GYG2	106.411	9536.4	6.47239	0.00560119
TR62265|c1_g1_i1	SOCS1	8.4394	287.358	4.93302	0.0321895
TR149463|c4_g3_i1	Glp1r	32.2477	0	-5.05518	0.0214267
TR102978|c1_g1_i4	Adam19	177.626	3.84276	-5.20497	0.0421399
TR144536|c0_g1_i6	Akap4	263159	235.476	-10.12	0.00216239
TR162564|c0_g1_i3	CLIP1	212.991	3.97885	-5.42559	0.0270857
TR162792|c1_g4_i1	SEMA3C	0	100.016	6.65844	0.00273218
TR149233|c2_g1_i1	WNT9A	6.29113	1269.68	7.44524	0.00145591
TR149240|c2_g1_i2	rx1	3.52331	420.443	6.54182	0.00720016
TR161654|c0_g1_i4	SIX3	0.259098	134.109	6.74559	0.00739896
TR173891|c0_g1_i3	HSPA12A	25.8411	0	-4.74637	0.0436901
TR146914|c0_g2_i2	MAP3K7	31.0136	0	-5.00061	0.0353831
TR174273|c0_g3_i1	FGF16	70.1149	0	-6.15208	0.00569987
TR155535|c14_g19_i1	TPD52L2	71.4436	0	-6.17879	0.00493185
TR102297|c0_g8_i1	ERI3	28.6633	0	-4.89061	0.035566
TR96522|c0_g1_i7	CACNA1G	0	84.3305	6.41499	0.00379154
TR85900|c3_g1_i1	SPRY3	40.5988	3426.74	6.36457	0.00607462
TR91389|c1_g1_i3	PSCA	62.3414	0	-5.98508	0.00786246
TR125924|c0_g2_i1	PPAP2C	163.923	4959.64	4.91066	0.0465091
TR115243|c11_g7_i2	SULT3A1	0.776617	201.579	6.83321	0.0029668
TR149480|c5_g4_i10	xerD	9.03714	293.964	4.87712	0.0430156
TR89183|c0_g2_i3	Nmbr	33.0837	0	-5.09101	0.0386438
TR91761|c0_g1_i3	Eomes	82.4562	18616.1	7.80139	0.00137575
TR152904|c0_g1_i2	Dkk1	64.7488	6079.86	6.53117	0.00495727
TR115412|c3_g4_i1	Dnajb6	2125.38	2.1997	-9.37625	0.00318628
TR119287|c0_g1_i7	Cacna1b	1.63143	256.227	6.61105	0.0045826
TR90463|c0_g1_i3	Mef2b	10.9303	426.815	5.16428	0.0416222
TR147643|c0_g1_i1	Figla	4.94731	874.069	7.20102	0.00317069
TR166354|c0_g2_i1	FZD7	5.85248	276.557	5.34002	0.0270057
TR162223|c0_g1_i1	MAFA	3.21118	253.694	5.9184	0.021326
TR107712|c0_g1_i1	pax2-a	0.828972	323.757	7.47218	0.0323246
TR131055|c0_g1_i2	CIDEA	99.1823	12126.7	6.91953	0.00309015
TR114457|c0_g1_i1	TSPAN3	1.37233	1138.93	8.90842	0.000340413
TR121314|c7_g4_i1	PLIN3	2.66647	6252.66	10.7361	0.00022184
TR162425|c1_g5_i1	CDC14B	956.522	0	-9.90316	0.000540499
TR96527|c0_g1_i1	CACNA1F	1069.9	26.5772	-5.2792	0.0338231
TR108331|c0_g1_i2	NPY5R	8.93108	435.573	5.45813	0.0169858
TR100152|c0_g1_i1	TRPC5	0.284937	54.1249	5.42294	0.0416888
TR103529|c0_g3_i1	Alx3	4.73722	481.188	6.3931	0.00505473
TR144560|c1_g1_i1	Eef1b	42.0199	0.259138	-5.0945	0.0455022
TR95358|c0_g1_i1	Gnaz	0	34.1852	5.1369	0.0233212
TR167426|c0_g1_i6	Ccl19	7.84569	830.597	6.55477	0.0439554
TR153604|c0_g1_i8	ZFHX4	6.73178	284.213	5.2051	0.0291642
TR168091|c1_g1_i1	GREM1	8.00008	708.519	6.30076	0.00676772
TR103409|c1_g1_i2	KIF21B	29.55	1744.18	5.83605	0.0150846
TR91414|c0_g1_i1	IGSF3	67.3784	1983.2	4.85887	0.0465106
TR96952|c1_g1_i7	DNAJC6	118.801	9615.77	6.32685	0.00834205
TR154501|c0_g4_i1	ATP9A	0.51752	46.9846	4.98279	0.0263204
TR115474|c0_g1_i1	FLNB	1435.93	40085.8	4.80207	0.0449361
TR18163|c0_g3_i1	TIPRL	0	601.074	9.2338	0.000488524
TR136052|c0_g1_i2	ADAP1	0	76.0452	6.26763	0.00452961
TR115045|c0_g1_i4	PIK3C2G	619.047	5.43873	-6.58946	0.0048392
TR126930|c14_g2_i6	ZNF189	276.366	4.86704	-5.56301	0.0313115
TR126323|c0_g1_i1	DGAT1	308.496	18656.6	5.9137	0.0145127
TR108869|c3_g2_i5	DGKI	4.04015	186.837	5.21987	0.0335316
TR120400|c0_g1_i1	CPD	0.259098	51.1906	5.37333	0.0256283
TR162403|c3_g2_i3	ANXA9	1.58043	111.591	5.44734	0.0275611
TR149234|c0_g1_i1	ZP2	58.3127	66015	10.1203	0.00022184
TR173075|c0_g1_i1	AKAP3	35549.2	44.7664	-9.60136	0.000285609
TR128869|c0_g1_i2	Col5a1	3060.59	2.87861	-9.62453	0.000230892
TR144782|c2_g7_i3	Sorl1	5.54103	5171.98	9.62726	0.000349778
TR149481|c0_g2_i1	Slc4a4	7.53626	948.504	6.79743	0.00432857
TR149313|c5_g2_i1	Cacna1h	22.3178	654.739	4.81362	0.0407691
TR114049|c0_g1_i1	Socs3	63.0275	6011.03	6.55302	0.00604039
TR94181|c0_g1_i2	Ifitm5	683.585	7.8501	-6.27339	0.00945441
TR138170|c0_g1_i1	Kcns1	9.8396	1273.66	6.87766	0.00331579
TR157643|c0_g1_i2	Hunk	36.3533	0	-5.22316	0.0216369
TR168104|c3_g5_i5	fzd8	100.239	7219.06	6.15618	0.00928839
TR109443|c2_g2_i1	TLX3	0	239.07	7.90731	0.000777189
TR131701|c1_g2_i1	PHF14	46.3466	0	-5.56519	0.0132021
TR120979|c0_g1_i1	BZRAP1	18569.5	191.135	-6.59475	0.00542006
TR130602|c0_g1_i1	STBD1	254.677	16215.7	5.98701	0.0129122
TR120781|c0_g1_i1	LRAT	21.2099	714.955	5.01059	0.0396769
TR162157|c3_g2_i6	KCNH1	25.1746	1147.37	5.45527	0.0241445
TR162655|c0_g1_i1	WISP3	218.099	4.0287	-5.44525	0.047791
TR143104|c1_g2_i3	NPTXR	750.169	3.24852	-7.46603	0.00204881
TR162409|c0_g1_i1	ETHE1	122.516	3322.25	4.74982	0.044692
TR161410|c0_g1_i3	ACSL3	65099.9	706.16	-6.5245	0.0359146
TR97639|c4_g1_i2	ADCY5	20.2212	810.91	5.25774	0.0243021
TR84848|c2_g1_i2	CPSF4	10.5142	490.558	5.41588	0.0238479
TR155454|c3_g2_i7	PPP1R17	50.0548	0.43282	-5.15512	0.0231072
TR127072|c1_g1_i1	CCNE2	79.237	2448.28	4.93195	0.0410639
TR166731|c0_g1_i3	AR	32.9482	0.259138	-4.75282	0.0436901
TR167899|c4_g2_i4	ASAP1	3.49611	683.29	7.24979	0.00240043
TR171448|c1_g1_i1	FOS	100.239	8534.46	6.39763	0.00915287
TR144332|c2_g1_i3	MSPJ	14.8571	4281.29	8.07711	0.000654526
TR162085|c0_g1_i2	V-FPS	1341.36	2.84102	-8.44907	0.0214832
TR98445|c0_g1_i1	AK1	39255.1	71.7938	-9.07488	0.00349126
TR97548|c0_g1_i2	LDLR	203.178	7335.82	5.16726	0.0368062
TR166808|c1_g1_i1	S100A1	43.6012	4269.67	6.58123	0.00529865
TR155360|c0_g3_i1	MBP	10607.4	253.001	-5.38424	0.0257298
TR147130|c0_g1_i1	PMP2	17.3963	12382.9	9.39483	0.000251525
TR130922|c0_g1_i3	SLC25A4	100.496	11675	6.84598	0.0039575
TR88071|c0_g1_i1	Fabp4	10.8461	3423.45	8.17532	0.000658924
TR144859|c20_g3_i1	pol	3381.81	20.2915	-7.3118	0.00252953
TR90598|c0_g1_i1	CALB1	37.6834	1920.13	5.63409	0.0277777
TR131818|c1_g4_i1	CLTA	57.9777	0	-5.8821	0.029975
TR57624|c0_g1_i1	Tuba1b	0.803132	1359.52	9.55944	0.000240956
TR109589|c3_g1_i1	KRT8	42.7831	2952.51	6.07592	0.0123603
TR115335|c2_g2_i1	IGKV4-1	40.7193	0	-5.38264	0.0460399
TR138448|c0_g1_i2	C8A	8.9623	5287.67	9.05221	0.000426169
TR3752|c0_g1_i1	CA2	631.756	0.284458	-8.94435	0.00321344
TR137433|c0_g1_i1	Serpina1a	0	59.248	5.91284	0.0336263
TR102396|c0_g1_i1	RET	17.8662	1541	6.35286	0.014642
TR114056|c0_g1_i1	Mgst1	152.845	0	-7.26533	0.0120927
TR126739|c0_g1_i1	KRT7	102.554	0.853373	-5.80409	0.0127816
TR114466|c0_g2_i1	MIM1	35.0693	0	-5.1727	0.0184753
TR193540|c0_g1_i1	TK1	0.259098	47.6742	5.2727	0.0272477
TR148062|c0_g1_i1	Pygm	6.91336	303.895	5.26788	0.02581
TR97811|c0_g2_i4	CPA1	109.662	0.853373	-5.89986	0.0366344
TR162682|c10_g1_i1	NPS	223.186	4.63322	-5.31459	0.0427945
TR109390|c0_g6_i1	H2B-V	9.05761	296.508	4.88657	0.0248952
TR53251|c0_g1_i1	H2B-VII	9.2704	3915.6	8.57496	0.000552282
TR120764|c1_g5_i1	Pde11a	51.0382	0.717277	-4.92138	0.0380031
TR149915|c3_g2_i1	Dnah2	6712.89	67.8178	-6.60822	0.00730119
TR119985|c0_g1_i2	Wipf3	56.7988	1758.17	4.92772	0.0460068
TR121376|c44_g16_i1	SPATA31D3	1464.25	3.47007	-8.35663	0.000913991
TR101256|c0_g1_i2	RSPH10B	2906.44	50.5156	-5.8186	0.0169496
TR152850|c0_g1_i1	UBC	337.823	0	-8.40439	0.00278005
TR144868|c35_g21_i1	Tf2-2	335.227	3.7573	-6.14315	0.0109214
TR174818|c0_g1_i1	Tf2-3	59.87	0	-5.92766	0.00702108
TR138328|c0_g1_i6	Tf2-7	0	147.177	7.21118	0.00132914
TR134411|c0_g1_i1	CCDC166	19753.5	17.473	-10.0625	0.00145753
TR162534|c5_g3_i3	EGF1	1.65794	254.392	6.58626	0.00628302
TR129083|c0_g1_i1	ETS2	139.881	5651.15	5.32625	0.0256078
TR144319|c3_g2_i1	CDH2	1.81166	100.544	5.17454	0.0204552
TR42504|c0_g1_i1	Txn	1928.74	1.96588	-9.34573	0.000309743
TR97842|c0_g1_i1	RAB3C	75.6395	0	-6.26002	0.00434476
TR131232|c0_g1_i1	NNT	95.9252	2.18665	-4.92676	0.0412654
TR167180|c4_g6_i3	Pol	2.07008	358.963	6.87343	0.00194274
TR154601|c2_g1_i1	Cltc	1.03639	140.633	6.12	0.0128028
TR109589|c4_g1_i5	Krt8	402.255	18916.8	5.55191	0.0224774
TR126906|c0_g1_i1	NEFH	47.9679	1875.45	5.26003	0.0201928
TR121039|c0_g2_i23	COL9A1	341.772	6.45273	-5.52334	0.024095
TR136851|c0_g2_i1	PRL	0	27.4824	4.832	0.0449725
TR27091|c0_g1_i1	MYCL	126.45	6951.53	5.76954	0.0154087
TR109427|c0_g1_i1	BMP2	22.789	1106.11	5.54036	0.0207018
TR174811|c0_g1_i1	MYL4	12180.4	22.3139	-9.02927	0.0149349
TR149505|c3_g3_i1	eef1as	0	79.1865	6.32529	0.0445261
TR121347|c8_g3_i1	SEC11C	0	134.012	7.07694	0.0345127
TR144866|c4_g1_i1	A1i3	595.921	5.976	-6.419	0.0102483
TR168292|c0_g22_i1	FOLR2	3.0296	3565.92	9.78983	0.000230892
TR121363|c22_g8_i2	TRIM27	16.653	3030.59	7.42402	0.00217429
TR141331|c0_g2_i1	CCNB1	1.42468	8104.95	11.707	0.00110464
TR114549|c0_g1_i6	GABRA1	134.477	0	-7.0819	0.0159836
TR117946|c0_g1_i1	POU2F1	200.388	0	-7.65383	0.0047289
TR168292|c0_g21_i1	FOLR1	0.51752	660.253	8.76734	0.000285609
TR154467|c0_g1_i2	CD19	63.753	1.73128	-4.5673	0.0487366
TR89945|c1_g1_i1	Hist1h1c	19791.4	44.8981	-8.7523	0.00130788
TR155364|c7_g3_i2	CREB1	53.018	0.543596	-5.12907	0.0455328
TR121333|c1_g2_i2	REL	50.4126	1406.91	4.77529	0.0472391
TR109041|c0_g1_i1	ZNF19	22.6313	881.47	5.22278	0.0281052
TR138575|c13_g1_i1	ZNF3	26.502	0	-4.78146	0.0352623
TR171280|c1_g1_i1	ZSCAN20	32.1763	0	-5.05208	0.0447099
TR48940|c0_g1_i1	Pou4f1	0	37.0591	5.25017	0.0248831
TR120705|c2_g5_i1	NPR3	35.2061	0	-5.17816	0.0400278
TR137433|c0_g6_i1	Serpina1	0	124.494	6.97148	0.00177545
TR149787|c3_g1_i1	fth1-b	1.55323	2939.71	10.1696	0.00022184
TR167743|c1_g4_i1	PTPRA	110.332	1.13783	-5.70257	0.0317258
TR103262|c0_g1_i2	Sdc1	222.33	35332.3	7.3057	0.00230644
TR144232|c4_g4_i1	BTN1A1	1.03504	73.8689	5.20124	0.0225612
TR144822|c18_g6_i1	TRIM21	0	175.952	7.46721	0.0010237
TR162207|c0_g1_i1	Gria2	2.58963	120.696	5.08331	0.0343434
TR155368|c0_g4_i1	Gria3	284.958	3.38462	-6.02721	0.0112324
TR131635|c2_g10_i2	CXCL2	41.5365	10244.8	7.91211	0.00123822
TR163026|c0_g1_i2	Zp2	30.3927	20760.8	9.36929	0.000258066
TR150716|c0_g3_i1	MSH3	0	247.831	7.95902	0.0005805
TR144235|c6_g7_i9	NEB	1151.16	26.0431	-5.41294	0.021684
TR149937|c9_g4_i1	jockey\pol	4292.68	23.9412	-7.42754	0.00259285
TR162995|c1_g5_i2	ABCB4	11.1317	830.842	6.09946	0.00834205
TR100973|c1_g1_i2	GABRG2	223.412	0.976415	-6.82712	0.0041002
TR129678|c0_g1_i1	ybx1	3954.51	7.66969	-8.83367	0.000519455
TR149770|c2_g6_i1	PDHX	7.12146	326.93	5.3355	0.0276592
TR127354|c0_g6_i1	BMP3	0.284937	173.819	7.08802	0.00224434
TR115079|c0_g1_i1	HRC	383.989	0.828053	-7.71837	0.00124096
TR144868|c35_g18_i2	gag	4454.95	89.6039	-5.62002	0.0222676
TR109596|c0_g1_i8	VAMP1	39.0768	1789.51	5.48146	0.0217406
TR149432|c0_g1_i1	Zfp36l2	0.51752	128.215	6.41191	0.00374791
TR174756|c1_g1_i1	Znf239	10.383	1328.37	6.86772	0.00352798
TR154594|c0_g1_i5	ATP1A3	2928.23	28.1776	-6.64952	0.0234646
TR125320|c0_g2_i3	anxa2-b	72.1999	0.259138	-5.86133	0.0103593
TR131819|c1_g3_i3	CKER1	343.213	8.73512	-5.14396	0.0465844
TR86439|c0_g1_i1	LMO1	58.9511	4215.46	6.1361	0.0121325
TR152564|c0_g2_i1	Ezr	0	26.7288	4.79331	0.0428791
TR108789|c0_g1_i1	CHRNB4	103.215	2.54707	-4.87679	0.0476414
TR86323|c0_g2_i1	ARF6	160.62	0.853373	-6.44631	0.0267999
TR109517|c0_g1_i1	Amh	1526.67	51.7532	-4.85593	0.0443811
TR138776|c1_g4_i1	CAM53	26.124	0	-4.7615	0.0450923
TR121076|c3_g1_i1	TUFT1	387.544	11972.6	4.94564	0.0420086
TR87416|c0_g3_i1	H2afx	1.32133	3687.04	10.6337	0.00022184
TR156565|c0_g2_i1	JUND	4.27405	781.384	7.21282	0.0325223
TR108649|c0_g3_i1	PSMB9	0	154.994	7.28535	0.00156441
TR155654|c0_g6_i1	H2-DMa	29.3957	0	-4.92579	0.0280383
TR143510|c0_g1_i1	EIF4E	15.5085	4558.04	8.10938	0.000839986
TR162385|c0_g1_i1	Vipr1	1037.91	3.30866	-7.91361	0.00133784
TR144391|c0_g4_i1	S100A6	0.259098	1321.27	10.0364	0.00022184
TR137441|c0_g1_i1	wnt8b	0	52.8253	5.75021	0.0340539
TR125721|c0_g1_i1	Gsx1	0.51752	61.3788	5.36127	0.015014
TR11072|c0_g1_i1	RRM2	353.063	10328.5	4.86662	0.0388703
TR162704|c1_g2_i1	pou3f1-a	4.7916	494.2	6.4179	0.00754563
TR174878|c1_g2_i8	Htr5b	14.1395	1650.48	6.7693	0.0047526
TR120412|c1_g1_i1	PRDX2	237.537	9571.98	5.32668	0.0280788
TR130827|c3_g2_i2	SLC8A1	46.9994	4265.57	6.47392	0.00601328
TR166786|c0_g1_i11	HPD	59.4236	1.38392	-4.66371	0.0431389
TR174594|c1_g1_i1	K-CAM	660.93	30677.9	5.53442	0.0210464
TR160496|c0_g1_i3	GUCY1A2	1705.64	35.3393	-5.55348	0.0300493
TR76213|c0_g2_i2	TUBA	30.7545	0	-4.98889	0.0362271
TR174865|c0_g1_i1	MCM7	4.65768	126.058	4.48913	0.0406399
TR85917|c3_g7_i6	F54H12.3	915.533	4.8069	-7.30227	0.0359509
TR121177|c4_g2_i1	HSPA1A	9390.24	9.36694	-9.82318	0.00187323
TR173075|c1_g2_i1	NDUFA9	0	1199.03	10.2288	0.00586443
TR101674|c0_g1_i2	CA8	731.91	23.2472	-4.91774	0.0416871
TR109392|c0_g1_i1	Ptpn11	121.501	13130.1	6.74405	0.0047526
TR120504|c1_g1_i1	Rab6a	0	89.4951	6.49977	0.00327913
TR109417|c0_g1_i2	Rab19	40.5622	8576.48	7.68914	0.00109246
TR104387|c0_g1_i1	ADM	75.1183	2059.1	4.75832	0.0435173
TR126973|c0_g1_i3	Hpcal4	48.4677	17195.4	8.4414	0.000580808
TR47592|c0_g1_i1	ADRA2C	1.29414	76.4009	5.07633	0.0246456
TR84842|c0_g1_i2	COMP	281.028	7.1071	-5.12051	0.0374532
TR154869|c0_g1_i2	thbs1	1706.98	2.55656	-8.90759	0.000428081
TR120514|c1_g1_i1	EDNRB	1.29414	261.585	6.83869	0.00237414
TR136976|c0_g1_i1	Gpm6b	33.2005	0.259138	-4.76351	0.0492402
TR168292|c0_g4_i1	Folr1	0	981.661	9.94055	0.00022184
TR162945|c0_g1_i2	VLDLR	876.768	64389.6	6.19687	0.00941927
TR138720|c0_g1_i1	Klc1	4.11767	171.796	5.07744	0.0398797
TR85829|c0_g1_i1	UPK3A	33.1149	22009.6	9.33358	0.00028083
TR98757|c0_g2_i1	CDKN1A	211.484	13097.9	5.94595	0.013787
TR154532|c1_g1_i2	CTRL	183.131	0.568915	-6.87482	0.00383273
TR152696|c0_g2_i1	ETV6	0	46.4386	5.56799	0.0228005
TR109888|c4_g4_i1	CD200	1361.53	36.0696	-5.1999	0.0304758
TR91361|c3_g2_i1	Tef	12.3232	377.758	4.82927	0.0368583
TR159743|c0_g1_i1	TAC1	8.72502	365.677	5.23666	0.0235908
TR118641|c0_g1_i1	Cd63	18.1451	5959.84	8.2824	0.000548081
TR91004|c0_g1_i1	VNX1	157.357	15717.7	6.63316	0.00598697
TR97566|c2_g3_i1	DCC	1.32065	62.0494	4.76388	0.0482705
TR85290|c0_g1_i4	ZAP70	1980.86	44.343	-5.44983	0.0200677
TR166295|c0_g1_i3	Hmx2	10.6407	418.338	5.17086	0.0281969
TR138424|c1_g5_i1	Syt1	165.496	0	-7.37934	0.00110478
TR144755|c0_g2_i1	UTRN	300.121	0	-8.2342	0.000548081
TR162957|c4_g8_i8	GALR1	3.44444	185.571	5.39158	0.0267293
TR137729|c0_g1_i1	GPR12	3.44308	250.213	5.8212	0.0107122
TR21950|c0_g1_i2	PENK	18.7815	899.207	5.50804	0.0283938
TR144369|c0_g1_i1	Nptx1	9.29895	2323.08	7.81802	0.00146472
TR103489|c0_g2_i5	ZFP36L2	21.6724	2075.3	6.51693	0.00580116
TR115116|c3_g1_i1	Gbx2	21.9037	1327.35	5.85791	0.0116317
TR125429|c1_g9_i1	GLIPR1	1049.69	1.82979	-8.53642	0.000454894
TR174225|c0_g1_i5	Epb41	2.09794	112.829	5.19941	0.0332692
TR129664|c1_g1_i1	SOX3	8.15717	5708.83	9.28433	0.00030315
TR144387|c0_g2_i1	SOX9	1637.35	54.3592	-4.88728	0.0405212
TR161176|c0_g1_i3	NMU	10.927	432.617	5.18412	0.0307808
TR141247|c1_g1_i1	ACADVL	8546.67	25.1542	-8.35235	0.000850509
TR129543|c0_g1_i1	RPS2	334.147	0.284458	-8.02749	0.000662117
TR109861|c0_g1_i2	Dnase1	0.777293	71.5706	5.35163	0.0304758
TR149813|c0_g1_i4	PTH2R	13.4139	595.873	5.37189	0.0242644
TR154180|c0_g2_i1	pxn1	386.166	0.865639	-7.69714	0.00095886
TR167755|c2_g1_i1	WNT4	105.491	7614.18	6.16007	0.00713762
TR154593|c0_g1_i1	SDC4	53.8822	2304.18	5.3924	0.0239075
TR130372|c0_g1_i6	PRLHR	3.67702	234.647	5.65489	0.0169482
TR114348|c0_g1_i2	RGS3	190.586	1.43455	-6.29819	0.00465807
TR88446|c0_g1_i1	wnt11b	9.89463	3453.15	8.30857	0.000911834
TR149787|c5_g17_i1	fth1-a	0	1187.58	10.215	0.00022184
TR27403|c0_g1_i1	CLTC	0	34.0519	5.13142	0.0242708
TR115407|c0_g4_i9	isl2b	432.323	3.80794	-6.49388	0.0060021
TR153654|c0_g1_i1	Nkx2-1	0.259098	118.78	6.57185	0.00702831
TR115149|c0_g1_i2	SERPINE1	62.9807	2132.38	5.05936	0.0258479
TR84724|c0_g1_i1	CSRP2	287.02	13753.2	5.57756	0.0209463
TR22148|c0_g1_i1	ST13	131.385	0.568915	-6.39883	0.00594354
TR167920|c2_g8_i1	H2B	12044.1	13.0605	-9.74258	0.000245627
TR130856|c1_g1_i1	TUB	3749.79	94.4459	-5.29637	0.0360941
TR89446|c0_g1_i2	Drd4	16.7849	1192.4	6.06828	0.0136459
TR149487|c0_g1_i4	CYP2J2	162.875	0.802734	-6.50626	0.00445486
TR131227|c0_g2_i1	HSD17B4	2721.82	4.23443	-9.02285	0.000446514
TR96797|c1_g10_i1	AFF3	739.313	5.60212	-6.80906	0.00339088
TR87363|c1_g1_i2	AKR1D1	10.8223	7411.5	9.29231	0.000276951
TR84634|c0_g1_i5	FUT6	103.583	0.543596	-6.08221	0.0110794
TR120363|c0_g1_i1	kpna1	459.628	20526.4	5.4778	0.0189448
TR174327|c0_g2_i2	JAK3	33.7868	0	-5.12047	0.0273161
TR114759|c0_g1_i1	EFNA3	9.1704	2157.37	7.72942	0.00187323
TR102092|c2_g2_i2	EFNA5	26.9265	1129.89	5.33968	0.0212009
TR166347|c1_g1_i1	Hmgb2	68583.3	47.2493	-10.4732	0.00167121
TR85576|c4_g1_i1	LBX1	0	23.7216	4.6277	0.0498618
TR113088|c0_g1_i1	GSC	13.333	2002.29	7.12688	0.00256411
TR166187|c0_g1_i2	BOX5	2.40872	189.824	5.80687	0.0153431
TR162125|c1_g2_i1	PTTG1IP	511.585	0	-9.00165	0.0022205
TR134968|c0_g1_i2	PLA2G16	5231.87	3.61843	-10.146	0.0150497
TR161547|c0_g1_i2	PDE1A	27180.7	46.0225	-9.17507	0.00759084
TR208249|c0_g1_i1	FABP5	105.539	7024.82	6.04321	0.00991289
TR165508|c0_g1_i1	CRYBB3	364.396	5.61241	-5.78814	0.0157929
TR127337|c1_g1_i1	GUCY2C	1240.2	12.0972	-6.56634	0.0218713
TR114641|c0_g1_i1	GFER	7140.83	6.56073	-9.88355	0.000230892
TR173924|c0_g1_i1	ag2	2.38288	212.674	5.98101	0.0124729
TR165215|c0_g1_i1	DLX1	0	266.294	8.06228	0.000504652
TR153275|c0_g1_i1	Aqp7	12161.2	17.0778	-9.39398	0.000309743
TR144786|c1_g2_i2	ARL4C	50.1515	3283.49	6.00475	0.010241
TR89398|c0_g2_i2	PITX1	1.03504	155.873	6.26839	0.0045826
TR85831|c6_g1_i1	St14	40.6029	3656.62	6.45808	0.00659475
TR155490|c0_g1_i2	CLDN15	9.83825	455.885	5.39763	0.0216463
TR95940|c0_g1_i1	CLDN6	58.9131	8554.44	7.15783	0.00304947
TR174796|c0_g2_i1	CLDN8	3.44511	268.019	5.91935	0.0154087
TR166572|c0_g2_i2	RGS8	186.671	0	-7.55206	0.00269656
TR97390|c4_g1_i3	Eef1d	3860.54	27.0231	-7.10641	0.0041002
TR138024|c0_g1_i2	FOXL2	0.51752	660.253	8.76734	0.000285609
TR173052|c0_g1_i2	OR4D2	81.8348	0	-6.37217	0.00348585
TR137981|c0_g1_i7	OR12D2	316.225	0.865639	-7.40969	0.00111984
TR82935|c0_g1_i2	PROK1	47.5474	0	-5.60132	0.0106377
TR114070|c0_g1_i1	Klhl8	35.8207	0.259138	-4.87001	0.0389401
TR159092|c0_g2_i1	RAP1B	0	2047.87	11.0006	0.0018111
TR162422|c0_g1_i4	STX1B	382.06	0.259138	-8.24899	0.0269468
TR91463|c0_g1_i1	LYZ	2037.08	1.64305	-9.59079	0.000230584
TR120983|c0_g1_i1	RAB11A	14.2103	7738.15	8.99098	0.000298089
TR134881|c0_g1_i1	RPS24	154.032	4739.09	4.93428	0.0338881
TR144404|c0_g4_i1	PPIA	377.121	0	-8.5627	0.00180393
TR128062|c0_g1_i1	Pfn1	18.9284	19120	9.90612	0.000230584
TR120177|c2_g1_i2	Lhx1	5.64777	470.371	6.14785	0.0126858
TR103675|c0_g2_i1	UBA52	32.043	0.43282	-4.52742	0.0447056
TR96851|c0_g3_i1	Pcp4	280.582	0.259138	-7.80497	0.0135301
TR166237|c1_g3_i1	H2A-IX	0.284937	81.0325	5.99643	0.0100551
TR149355|c1_g4_i2	Nfix	78.0838	0	-6.30531	0.00486117
TR155082|c2_g2_i1	Gpr143	1.65794	760.022	8.16148	0.000952462
TR127258|c2_g3_i2	Tp53bp1	3.2887	179.099	5.3921	0.0232734
TR144872|c3_g1_i1	Myo5b	0.284937	191.853	7.22966	0.00205879
TR126987|c4_g1_i4	GPC5	1.37233	62.9396	4.75233	0.0480687
TR155416|c1_g2_i2	CNTNAP1	0	103.364	6.70548	0.0203282
TR157080|c0_g1_i1	CSNK1G2	0.284937	36.4419	4.86488	0.0452424
TR174139|c1_g1_i2	POU6F2	115.709	2.6072	-5.0159	0.0496774
TR166298|c0_g1_i3	ELF3	3.62264	95.4924	4.38363	0.0487366
TR97160|c0_g1_i2	CYP1A5	12.0946	744.833	5.83181	0.0145312
TR97763|c1_g7_i1	ZP3	7.19897	9498.78	10.1782	0.00022184
TR162897|c1_g1_i1	ENTPD2	5.25542	244.609	5.29511	0.0211685
TR85934|c2_g4_i1	KRAS	0	165.041	7.3754	0.0396648
TR19106|c0_g3_i1	GUCA1A	95.7658	1.29569	-5.3975	0.0351497
TR114028|c0_g1_i1	BDMD1	379.662	0	-8.57237	0.0385404
TR119629|c1_g3_i1	ADH4	0.518195	97.6122	6.02134	0.0109416
TR128888|c0_g1_i2	PRLH	5.33496	5480.53	9.75703	0.000230892
TR42880|c0_g1_i1	VDAC2	0	48.3598	5.62527	0.0111297
TR126488|c0_g4_i1	MRPS17	96.6747	0.284458	-6.24875	0.00563989
TR131079|c0_g1_i2	OPTC	22.3457	3304.28	7.14547	0.00259492
TR125165|c0_g1_i1	SCRN1	23.6439	976.564	5.30989	0.0295304
TR140983|c0_g1_i1	VTG1	559.455	6.57023	-6.21012	0.0109614
TR106121|c0_g1_i1	ACT1	5.28261	2724.77	8.76109	0.000476677
TR131635|c2_g4_i1	Cxcl5	1.06155	220.543	6.74771	0.00363869
TR138460|c0_g1_i1	DAB2	352.601	49386.4	7.12588	0.00224434
TR114278|c0_g1_i1	MUC5AC	109.516	2.22502	-5.0988	0.0490463
TR85295|c3_g1_i1	SLC25A3	2521.96	8.20102	-8.09911	0.000911219
TR104691|c0_g1_i1	PTK2	0	29.5832	4.93467	0.0317184
TR85770|c0_g1_i1	RHBDF2	165.31	8108.94	5.60774	0.0204015
TR92225|c0_g1_i1	hes2	0.259098	46.5649	5.23943	0.0264984
TR155660|c0_g1_i5	Apoh	13.6438	400.79	4.77808	0.0435178
TR6463|c0_g2_i1	TFAP4	4.91948	308.538	5.7085	0.0137631
TR109023|c1_g2_i1	msxc	7.1201	406.433	5.64892	0.0149313
TR142696|c0_g1_i1	Hoxd1	0.544035	52.3719	5.1113	0.0340425
TR443|c0_g1_i1	POU4F1	0	47.9618	5.61359	0.0126554
TR166315|c0_g1_i1	Myh6	3517.73	84.4184	-5.36436	0.0353292
TR138389|c0_g7_i1	CREB5	0	28.5463	4.88491	0.0328498
TR109431|c1_g2_i1	MLLT1	36.2704	0	-5.21996	0.0245927
TR127104|c0_g1_i4	Gja4	70.2013	22127.5	8.27979	0.000808063
TR87061|c0_g1_i1	Btc	46.1445	2660.71	5.81912	0.0140343
TR87041|c0_g1_i1	SNX1	453.293	19490.7	5.42309	0.0251649
TR109135|c0_g1_i2	LRRC63	2748.34	24.5572	-6.74921	0.00501198
TR148781|c0_g3_i3	ITIH3	1.9422	120.138	5.36361	0.0227127
TR115418|c4_g2_i1	AOX1	43.7704	0.518276	-4.88204	0.0441528
TR121308|c0_g1_i2	ZNF33A	64.3548	2016.51	4.94814	0.0439403
TR168044|c2_g2_i2	PLB1	2587.57	40.6379	-5.95811	0.0166701
TR175179|c3_g2_i7	Zscan2	167.193	6464.16	5.26449	0.0299281
TR125922|c0_g1_i1	PDE4B	37.8085	2348.11	5.9196	0.0131905
TR84053|c1_g3_i10	MYH13	115.688	0	-6.86651	0.00783843
TR162945|c1_g1_i1	LRP1	1132.32	66641.5	5.87781	0.0114588
TR174814|c2_g1_i5	IFNT8	7.48526	2132.9	7.97432	0.0144521
TR126523|c0_g1_i6	Rbp2	1.37301	101.065	5.42663	0.0290189
TR155150|c2_g1_i1	SPIRE1	30.1172	6698.62	7.75022	0.00139056
TR103177|c1_g2_i1	ctdspl2a	18.7183	14126.6	9.48476	0.000251525
TR144142|c0_g1_i1	EBF2	0.259098	36.972	4.91447	0.0429517
TR90932|c10_g1_i1	K02A2.6	281.149	0.543596	-7.51402	0.00154685
TR162449|c0_g4_i1	RAD51AP2	293.624	1.63079	-6.80724	0.00322123
TR162674|c0_g6_i6	SAMD5	16.6244	674.677	5.26069	0.0285532
TR84256|c1_g1_i4	GAL14	124.209	0.802734	-6.118	0.0102268
TR136242|c0_g1_i1	TPH2	16.9372	910.107	5.66659	0.0180706
TR144540|c0_g1_i1	inf2	2.09659	553.025	7.48313	0.0011786
TR153434|c0_g1_i2	SUN3	2025.03	11.8195	-7.30418	0.00282568
TR96919|c1_g11_i1	ACMSD	39.0715	0	-5.3245	0.0187393
TR96759|c0_g1_i1	PFKM	9935.32	87.8469	-6.80525	0.0287671
TR155530|c3_g2_i1	CCDC15	191.914	0.802734	-6.74163	0.0211997
TR165255|c0_g1_i1	COX6C	375.023	0	-8.55468	0.000285609
TR115355|c0_g4_i1	SLC25A25	78.2879	0	-6.30903	0.0151713
TR82520|c0_g1_i1	STRA6	0	440.966	8.78779	0.000679186
TR125462|c1_g1_i1	Tex26	8618.2	57.8459	-7.19447	0.00347511
TR109817|c0_g1_i1	Prelid2	12.4067	760.681	5.82816	0.0163394
TR95591|c1_g1_i1	RIBC1	2261.4	15.0359	-7.1404	0.00317069
TR109657|c1_g1_i1	TP53I11	160.342	14443.2	6.48423	0.00713842
TR166867|c0_g1_i4	CLEC1A	159.359	0.691958	-6.56646	0.00339982
TR125679|c0_g1_i1	VAPA	0	25.7622	4.74213	0.0418074
TR154595|c0_g2_i2	HYAL2	612.367	21422.6	5.12631	0.0311325
TR128389|c0_g1_i1	PTPN13	6466.66	147.373	-5.44595	0.0309255
TR173833|c0_g3_i1	CBX3	0	1171.88	10.1958	0.00022184
TR115605|c3_g1_i2	ADAM9	771.682	19.0595	-5.26752	0.027659
TR154945|c0_g1_i1	RAB32	396.003	20149.8	5.66554	0.0170371
TR97547|c0_g1_i2	RIN1	6.03203	191.284	4.77316	0.0493659
TR161952|c0_g1_i1	KLF5	35.4421	2206.55	5.9207	0.0103682
TR121313|c0_g3_i1	CKAP5	4149.49	1.96588	-10.4506	0.000413466
TR148402|c0_g1_i1	RAB33A	65.6708	2101.59	4.97897	0.0439632
TR109640|c0_g1_i1	URB2	274.498	11354.6	5.36522	0.0254241
TR239075|c0_g1_i1	TTLL12	2.95208	148.848	5.24475	0.0291513
TR168269|c0_g1_i3	E2F2	100.295	4359.52	5.42787	0.0182388
TR162264|c0_g1_i1	TRIM25	8793.59	6.86695	-10.1266	0.000230584
TR126430|c1_g1_i2	GBX1	13.5968	8552.33	9.19469	0.000371969
TR110485|c0_g1_i1	ITPR3	0	25.2879	4.71633	0.0456064
TR174436|c1_g1_i2	ZNF271	3.98847	365.772	6.20014	0.00983386
TR126398|c2_g3_i1	PDCD11	377.933	0.284458	-8.20464	0.000483771
TR102697|c2_g1_i4	SSPN	7.61314	2434.83	8.14366	0.000823084
TR131030|c2_g1_i2	STAT4	1.34717	806.415	8.42625	0.00628302
TR160946|c0_g1_i1	NFATC4	3.41725	148.129	5.07727	0.0277641
TR148315|c0_g1_i1	MAD2L1BP	54.2608	4832.06	6.45054	0.00785022
TR155497|c0_g1_i1	CDK5R1	22.7068	756.64	4.99814	0.0337982
TR109443|c2_g1_i3	NKX1-1	1.60559	674.557	8.01832	0.000979194
TR115188|c4_g3_i2	UBE3C	354.849	0.43282	-7.95627	0.0423398
TR144694|c2_g1_i3	SYCP1	3823.1	112.159	-5.0787	0.0370931
TR173147|c0_g1_i1	MLF2	401.143	8.07204	-5.47014	0.0209691
TR85452|c13_g14_i1	ZNF79	45.8547	0	-5.55012	0.0283938
TR101433|c0_g1_i1	SGCA	37366	47.2861	-9.59594	0.000288877
TR91761|c3_g1_i1	TBR1	2.43456	103.035	4.9208	0.0471314
TR91163|c0_g1_i1	FSCN1	350.545	27592.3	6.29446	0.00860351
TR130867|c1_g1_i1	DUSP5	103.585	7777.51	6.21675	0.00926537
TR93434|c1_g1_i2	MEP1B	268.593	2.21197	-6.39118	0.00726197
TR155479|c7_g2_i1	UPP1	8136.51	15.1329	-8.97844	0.000456913
TR174743|c0_g1_i1	Rhov	8.6522	765.714	6.31169	0.0105846
TR109492|c0_g2_i3	SNAP25	113.204	0.568915	-6.18571	0.00675762
TR89400|c0_g1_i1	RAB39B	64.919	1.43455	-4.75897	0.0359439
TR90879|c0_g1_i1	CDK5RAP2	28130.6	709.282	-5.30766	0.033353
TR109785|c3_g1_i2	SERPINB1	9.06231	378.544	5.23723	0.0269045
TR115497|c0_g1_i6	skor1b	9.11669	694.757	6.10377	0.0114941
TR109664|c3_g1_i1	FSTL3	35.3203	1088.36	4.90656	0.0462285
TR155364|c3_g1_i1	CREM	103.893	0	-6.71277	0.00282676
TR126484|c0_g2_i1	INSC	11.8083	1096.2	6.4206	0.00695026
TR121223|c1_g1_i7	TRIM71	23.2277	1996.16	6.36515	0.00713762
TR83534|c0_g1_i1	FAM92B	40.3166	0.284458	-5.00749	0.0374035
TR84657|c0_g1_i2	COPA	53.9842	0	-5.78095	0.00975161
TR143007|c0_g1_i2	CYLC2	2370.36	4.11495	-8.85678	0.000537381
TR174391|c1_g4_i3	PROC	318.176	5.30263	-5.66226	0.0218102
TR53215|c0_g1_i1	TRHR	4.22173	226.566	5.44561	0.0264606
TR130114|c0_g2_i3	SLC14A2	1.57907	124.819	5.60836	0.0136077
TR84877|c9_g6_i4	dym	44.1732	0	-5.49739	0.0142256
TR97764|c0_g2_i2	tbpl2	35.9737	1576.86	5.41533	0.0269468
TR167429|c1_g3_i1	foxh1	206.373	1.81673	-6.20206	0.0163394
TR129416|c0_g1_i1	birc5.1	25.2719	9738.14	8.53413	0.000567191
TR97385|c0_g1_i5	foxn5	32.8109	1973.03	5.86752	0.01438
TR137771|c1_g1_i1	hoxd1	1.86469	3670.14	10.3236	0.00113316
TR149235|c0_g4_i1	tuba	0.544035	674.154	8.77237	0.000404838
TR141614|c0_g1_i1	ODF1	119906	100.292	-10.2092	0.00120516
TR132115|c0_g1_i1	CELA2A	432.425	0.951096	-7.79535	0.0205162
TR5902|c0_g1_i1	Pkd1l3	230.477	1.1501	-6.75033	0.00304947
TR168274|c16_g23_i1	gag-pol	2.89905	205.129	5.72428	0.0108711
TR89173|c0_g1_i2	RND1	133.673	16694.3	6.95383	0.00376949
TR85029|c0_g2_i1	USP2	14598.9	195.608	-6.21449	0.0231471
TR138128|c2_g1_i11	HORMAD1	1181.58	13.4696	-6.35277	0.00731179
TR89345|c0_g1_i1	SDCCAG3	1464.97	1.91524	-8.97403	0.000444767
TR144810|c19_g4_i1	A1BG	2.43456	125.487	5.20272	0.0353831
TR103171|c1_g2_i1	KIF26B	1.06155	65.3415	5.00811	0.0364681
TR125623|c0_g1_i1	ISX	4477.65	31.997	-7.08459	0.0397035
TR114804|c0_g1_i1	SOWAHA	478.999	0.259138	-8.57445	0.0221898
TR159440|c0_g1_i1	SSPO	1424.93	6.7091	-7.53113	0.00188567
TR130389|c0_g1_i1	HIST1H2BK	8516.45	7.08178	-10.0415	0.000223206
TR165900|c0_g1_i2	Os11g0104900	1.08739	785.184	8.55702	0.00142678
TR102316|c3_g1_i2	EFCAB3	5626.04	13.8546	-8.56533	0.000712853
TR104631|c0_g1_i1	NMB	11.1576	1546.25	6.99171	0.00243681
TR156756|c0_g1_i2	ANKRD61	5301.04	9.05993	-9.04178	0.00860703
TR109670|c2_g4_i2	SPATA22	1888.01	54.8237	-5.08061	0.0287671
TR175135|c1_g5_i2	KLHL40	39.7175	0	-5.34758	0.0185705
TR90648|c0_g1_i1	PIFO	1605.73	32.1046	-5.60095	0.0254241
TR174936|c0_g1_i1	ACR	1079.66	1.39697	-8.81649	0.00302645
TR109028|c1_g1_i1	PLCZ1	33548.2	55.3221	-9.21836	0.0103523
TR115497|c0_g2_i3	SKOR2	5.49135	209.151	5.01676	0.046718
TR95611|c0_g1_i1	TMEM249	578.784	0.568915	-8.5296	0.0276065
TR102299|c2_g1_i2	FER1L6	1030.13	1.08719	-8.94844	0.0300493
TR126785|c1_g1_i2	SYNGR4	2752.05	75.7624	-5.16449	0.036673
TR29291|c0_g1_i1	SLC25A31	966.096	4.05125	-7.58087	0.00140602
TR136236|c0_g2_i5	FAM71D	3020.27	2.56012	-9.72901	0.000352115
TR120524|c0_g1_i1	METTL1	131.415	4039.53	4.93141	0.0349227
TR174800|c1_g1_i5	ANAPC10	51.6373	1851.37	5.13714	0.0351185
TR137437|c0_g1_i1	FNDC8	453.777	0.717277	-8.04889	0.00312071
TR95587|c1_g1_i5	CDRT4	5044.98	3.85225	-10.0223	0.0439863
TR120051|c0_g1_i2	CCDC105	4797.69	6.14295	-9.39191	0.000285609
TR120618|c0_g2_i1	ZNF572	37.1367	5425.41	7.15267	0.00293435
TR126162|c1_g1_i2	SMRP1	1433.24	0	-10.4861	0.00022184
TR84850|c0_g1_i1	ZNF414	126.593	5807.41	5.50852	0.024387
TR136272|c0_g1_i1	IRGC	1235.29	1.75383	-8.81036	0.000470541
TR136975|c0_g1_i1	ACTL7A	39948.7	81.467	-8.92015	0.00824391
TR143622|c0_g1_i1	FANCD2OS	9429.09	13.9733	-9.29874	0.000309743
TR119849|c0_g1_i1	TEKT1	8301.86	139.71	-5.88281	0.0170112
TR155459|c0_g1_i4	FBXO39	22388.9	34.3177	-9.30824	0.00189134
TR126537|c0_g2_i4	LIN7A	1.31998	76.2458	5.05727	0.0251976
TR53286|c0_g2_i1	PDCL2	7741.6	20.1894	-8.51333	0.000626319
TR154317|c0_g1_i1	plcd4	0.544035	49.288	5.02544	0.0443811
TR102399|c0_g1_i2	elovl5	115.086	2.43352	-5.07936	0.0423398
TR41420|c0_g1_i1	RIIAD1	171.012	0	-7.42637	0.0078489
TR125758|c0_g3_i1	EEF1A2	42.228	0	-5.43389	0.0322682
TR155693|c0_g1_i3	GRIK2	4.76644	308.135	5.74441	0.0185542
TR127305|c1_g1_i1	LASP1	2.5876	463.907	7.01778	0.0222084
TR112028|c0_g1_i1	tctex1d1-a	0	598.667	9.22802	0.0035612
TR131666|c2_g2_i1	sox17a-a	5.43565	185.222	4.8548	0.0331735
TR131613|c6_g7_i1	ZNF792	20.481	1173.39	5.7727	0.0150847
TR149330|c1_g11_i1	CHD9	34.1607	0	-5.13589	0.0204786
TR169944|c0_g2_i2	rab11fip4a	0	35.8738	5.20452	0.0224124
TR137718|c0_g1_i3	tbx1	32.9408	970.47	4.83908	0.0476565
TR93162|c0_g1_i1	AP1M2	10.7713	421.013	5.16394	0.0287826
TR138238|c6_g7_i1	SH3YL1	0	61.3539	5.96241	0.00735627
TR174260|c0_g3_i1	RPL13A	0	354.42	8.47338	0.0163122
TR109511|c2_g1_i1	ERH	469.065	2.38288	-7.11847	0.0207405
TR114771|c5_g1_i1	SPATA19	16787.1	15.4347	-9.99647	0.000230892
TR143798|c0_g1_i6	TEX29	410.788	0	-8.68576	0.00322332
TR96266|c7_g8_i5	TSGA13	1141	14.5089	-6.20232	0.0119879
TR96403|c0_g1_i1	ROPN1	33507.6	68.2561	-8.91837	0.00309304
TR131507|c0_g1_i1	TPPP2	99082.8	82.8287	-10.207	0.000516644
TR143783|c1_g1_i1	GDE1	7103.87	177.943	-5.31124	0.0364979
TR97608|c2_g1_i1	SEC61G	188.9	0.543596	-6.9428	0.00230633
TR146801|c0_g1_i1	Shcbp1l	11826.9	188.524	-5.96367	0.0147048
TR98022|c0_g1_i1	Psmd1	0.259098	53.9624	5.44798	0.0197415
TR120184|c0_g1_i1	Arhgef16	136.593	5943.8	5.43315	0.0267229
TR131592|c3_g2_i1	Wnk2	227.03	7.0347	-4.82684	0.0467239
TR119887|c0_g1_i1	Nkx6-3	19.2385	920.888	5.50942	0.0457302
TR169360|c0_g1_i1	Lmod2	166.317	0	-7.38644	0.000904936
TR137263|c0_g1_i1	Fam83f	3.78105	288.998	5.92257	0.0128803
TR167793|c0_g1_i2	Fhdc1	17.9723	757.969	5.32208	0.0288735
TR100514|c0_g1_i3	Thsd4	2.97724	562.532	7.14658	0.00219404
TR155445|c0_g1_i2	Rnf223	1.96872	397.792	7.06965	0.00354178
TR120374|c0_g1_i1	Fam71f1	2837.57	6.55124	-8.55423	0.000662117
TR121160|c4_g1_i8	Ankrd42	3471.06	31.3268	-6.74692	0.00584078
TR155381|c4_g1_i4	Acrbp	1478.08	11.1678	-6.92548	0.00509793
TR108350|c0_g1_i11	Sel1l2	475.553	9.18693	-5.54784	0.0268878
TR172798|c0_g2_i1	Gm614	103.082	0.284458	-6.34042	0.0129174
TR89335|c0_g1_i2	HES1	52.3683	3173.56	5.89443	0.0145103
TR144683|c1_g1_i2	ACTC1	376.912	12544.8	5.053	0.0366435
TR138362|c0_g1_i1	CNDP2	686.335	25757.5	5.22789	0.0301846
TR138546|c2_g1_i1	PLAC8	9.19623	679.413	6.0603	0.0149137
TR4099|c0_g1_i1	SKP1	54.4658	0	-5.79353	0.0318878
TR91276|c0_g2_i4	AZGP1	0.259098	387.059	8.26774	0.029609
TR114975|c0_g1_i1	CCT8	4080.98	2.6167	-10.1404	0.0263252
TR71648|c0_g1_i1	TUBA1C	2.12446	2399.33	9.58541	0.000263724
TR90262|c0_g1_i1	C1orf177	2207.76	1.86461	-9.59069	0.00152299
TR93564|c1_g1_i1	ZNF568	41.9826	0	-5.42568	0.0130153
TR108256|c0_g1_i4	FGF9	9.78725	442.851	5.36268	0.0224995
TR124164|c0_g1_i1	Tmem247	25730.9	36.3022	-9.43008	0.000352115
TR155502|c8_g1_i1	GALNTL6	0.284937	90.667	6.15663	0.00848809
TR102899|c0_g1_i2	PCDP1	3821.38	20.6357	-7.46491	0.00265274
TR129707|c0_g1_i2	CCDC40	4015.92	91.8356	-5.43527	0.0264208
TR166329|c0_g1_i2	FBXO43	8.3911	1015.75	6.75845	0.00501198
TR85827|c0_g3_i1	TPRN	82.0565	5358.09	6.01175	0.0107633
TR114346|c1_g1_i1	SVEP1	8.26391	649.408	6.13358	0.0136701
TR165740|c0_g1_i1	PLIN2	0.544035	1010.62	9.35574	0.000251525
TR149868|c2_g1_i1	Tmem184a	36.4349	7288.15	7.60522	0.00162525
TR129189|c0_g1_i1	TEKT5	3378.14	4.63322	-9.22848	0.00182956
TR129793|c3_g1_i3	ZNF668	42.9347	1816.61	5.37054	0.0268147
TR121260|c3_g2_i1	RFX3	34.7715	0	-5.16074	0.0251976
TR148474|c0_g1_i1	FA2H	29.0503	5733.5	7.57614	0.0014542
TR101345|c2_g1_i1	ACTB	14.942	21094.8	10.3699	0.00022184
TR83572|c0_g1_i1	TEKT2	8781.76	17.3535	-8.90247	0.000488626
TR171892|c0_g1_i1	USP50	17582.4	14.3194	-10.1646	0.00231779
TR114693|c1_g1_i2	FAM200A	1.57907	177.874	6.11595	0.00702888
TR84301|c0_g1_i1	IZUMO4	2478.44	32.0401	-6.22965	0.0355799
TR114316|c0_g1_i2	ZNRF4	24295.1	21.423	-10.0815	0.000230892
TR174905|c0_g1_i1	HEATR9	2378.35	19.8852	-6.83194	0.00435799
TR84523|c0_g5_i1	FAM154A	6008.38	5.23617	-9.91234	0.00244508
TR94201|c0_g1_i1	DNAJB6	5508.43	38.4268	-7.12659	0.00375653
TR143722|c0_g1_i1	FAM187B	10399.2	8.26392	-10.1327	0.0101982
TR175176|c7_g21_i1	ZNF274	105.593	0.802734	-5.88578	0.0433833
TR121004|c0_g1_i1	BRDT	12.8162	10078	9.51078	0.000244522
TR84038|c0_g1_i1	Rhbdd1	856.496	2.64479	-7.87815	0.0317184
TR96623|c3_g1_i1	Lrrc8a	129.153	5514.28	5.40515	0.0258302
TR147628|c0_g1_i1	ATP13A5	65.9419	0	-6.06484	0.00492585
TR129532|c0_g1_i1	tmem127	592.913	1.46937	-7.90996	0.000934679
TR118449|c0_g1_i1	Cpa2	66.2728	1.00174	-5.0707	0.0422082
TR144593|c0_g1_i1	MIDN	111.698	3956.64	5.13411	0.0300659
TR166330|c1_g1_i1	LINGO1	68.1892	1738.1	4.65165	0.0455392
TR94048|c0_g1_i1	SPATA45	671.993	16.4107	-5.27254	0.0363961
TR95625|c0_g1_i1	C4orf17	5018.78	5.8304	-9.52144	0.000271295
TR168224|c2_g1_i1	ACSM3	320.627	9.93862	-4.87789	0.0405846
TR100838|c0_g1_i3	KLHL12	168.504	3.7573	-5.15504	0.0288735
TR95316|c0_g1_i1	ALS2CR11	3739.04	5.24922	-9.22516	0.00038464
TR90535|c0_g1_i2	CCDC157	17675.4	263.93	-6.06007	0.0479123
TR167713|c0_g1_i1	MRO	73.7295	0	-6.22361	0.00586107
TR162592|c1_g1_i1	CPT1B	1913.18	23.1361	-6.30939	0.0109242
TR119890|c0_g1_i1	ARHGEF9	907.823	1.81673	-8.33383	0.000543478
TR154285|c2_g5_i1	LONP1	3.98982	376.438	6.24111	0.0113643
TR114012|c0_g1_i1	PDGFRL	60.9261	3035.71	5.61582	0.0175796
TR114627|c2_g7_i1	zgc:112234	60516.4	44.36	-10.3817	0.00039401
TR147773|c0_g1_i4	CCDC178	2610.59	34.8515	-6.18675	0.0123603
TR126375|c0_g1_i1	FSIP2	5200.58	21.1211	-7.87738	0.0014194
TR102742|c0_g2_i5	UMODL1	44.2983	0.284458	-5.14023	0.0346289
TR126186|c1_g1_i1	OSER1	235.284	0	-7.88438	0.00418006
TR125624|c0_g1_i2	BCL2L14	67.8707	4314.04	5.96934	0.0119916
TR130908|c0_g1_i1	PPP2R2B	54.4004	2242.53	5.33973	0.0224418
TR102954|c0_g2_i8	HABP2	161.232	3.43526	-5.1929	0.0460399
TR102999|c0_g1_i1	ARL15	0.259098	37.4867	4.9339	0.0456333
TR101331|c0_g1_i1	odf3	8298.45	16.679	-8.87484	0.0021299
TR130127|c1_g1_i1	RILPL1	81.284	5861.71	6.15481	0.00972725
TR144221|c0_g2_i1	SPPL2B	13956	12.0212	-10.0659	0.000493863
TR120292|c0_g1_i2	LPP	1572.06	33.8865	-5.49476	0.0297746
TR21134|c0_g1_i2	C2cd4cC2CD4 family	65.4506	3340.13	5.65191	0.015479
TR156107|c0_g1_i3	Ggnbp1	2985.7	44.2152	-6.0456	0.0106562
TR175149|c0_g3_i4	ZNF831	1244.97	26.8637	-5.48274	0.0245235
TR115291|c0_g1_i1	AMER1	26.3341	1828.5	6.0646	0.00987933
TR102186|c0_g1_i1	EFHC1	17967.4	54.5594	-8.33722	0.000978818
TR138424|c1_g4_i1	mogat2-b	7.71717	4086.04	8.87298	0.000456913
TR67045|c0_g1_i1	grhl2	0	25.8691	4.74787	0.044264
TR174961|c21_g1_i1	G0s2	10.4625	549.251	5.5851	0.0274409
TR156421|c1_g1_i1	Cnrip1	10.827	1072.76	6.50444	0.00747576
TR162267|c1_g2_i2	ABCG2	1693.05	15.5229	-6.67986	0.00482402
TR114547|c0_g1_i7	FBXO47	311.36	7.19255	-5.25275	0.0281052
TR144467|c0_g1_i4	EDN2	18.7536	4349.27	7.78285	0.0361726
TR149301|c0_g1_i2	FAM107A	8057.58	37.5414	-7.70797	0.00186916
TR156085|c2_g2_i2	Lamp5	6.99291	1103.26	7.11014	0.00331579
TR144342|c0_g1_i1	ttc34	166.1	0.951096	-6.42029	0.00690712
TR149233|c6_g1_i9	Diras2	8.23536	3929.85	8.73346	0.000504652
TR128305|c0_g1_i1	ZNF436	87.5341	10928.5	6.94778	0.00402717
TR102816|c0_g1_i1	UBQLN1	4951.18	6.175	-9.43087	0.00032606
TR132855|c0_g2_i1	ERMN	84.5525	0.259138	-6.0863	0.00985751
TR131603|c0_g4_i1	TMED1	209.456	0	-7.71738	0.00505473
TR102103|c3_g2_i2	CKAP2	2273.66	64.5866	-5.11611	0.0315346
TR109750|c1_g2_i4	AQP1	1.83952	191.075	6.07988	0.0126684
TR129386|c0_g1_i1	FTH1	0	114.357	6.84996	0.00224336
TR115568|c0_g8_i5	SUSD4	34.4675	1441.7	5.34613	0.0267038
TR46239|c0_g1_i1	DUSP18	2309.98	8.31456	-7.9548	0.00282944
TR81680|c0_g1_i5	MSRB3	71.7468	0	-6.18481	0.00399193
TR283789|c0_g1_i1	ACTA1	5.30845	243.01	5.27351	0.0276065
TR144157|c0_g4_i2	MAL2	28.6741	1015.54	5.09832	0.0433003
TR148020|c0_g1_i5	SH3BGRL3	2817.44	28.631	-6.57165	0.00601943
TR109390|c0_g5_i2	HIST2H2BE	12.009	434.226	5.06418	0.0237478
TR174770|c1_g1_i10	TMEM104	363.99	2.42047	-6.73752	0.00477258
TR131675|c0_g1_i1	AEN	86.8917	7109.79	6.33814	0.00629637
TR175165|c0_g1_i1	TRIM54	2901.67	20.2883	-7.09117	0.00455572
TR89377|c0_g1_i4	ANKRD27	255.092	8636.36	5.07585	0.0354652
TR103248|c3_g2_i2	SIK2	6.16326	908.788	6.98877	0.0272465
TR120420|c0_g5_i1	COPS6	833.208	0	-9.70426	0.00022184
TR89405|c0_g2_i1	ATP5F1	0	63.0836	6.00188	0.0399675
TR125855|c0_g3_i1	ATP5G3	0	1445.5	10.4984	0.00961736
TR126893|c0_g2_i5	ERICH3	8.28434	618.513	6.06019	0.00811861
TR174709|c4_g4_i2	ZMYM1	144.667	0.259138	-6.8541	0.00287888
TR121155|c0_g2_i1	Med13	3.13298	199.715	5.60182	0.0163899
TR106912|c0_g1_i1	GLYATL3	0	29.1057	4.91196	0.0372629
TR138707|c4_g2_i1	FREM2	5.54306	738.339	6.82013	0.00469922
TR101882|c0_g3_i6	CELF3	127.11	1.37165	-5.75535	0.0177339
TR127271|c0_g1_i2	C6orf132	12.7108	1918.52	7.12929	0.0020406
TR138690|c0_g2_i5	DCST1	962.629	2.52175	-8.09604	0.00204856
TR152466|c0_g1_i1	C1orf194	9330.62	32.3997	-8.12615	0.00125374
TR100128|c0_g1_i2	C6orf118	1494.53	5.16377	-7.92263	0.00133209
TR114678|c0_g1_i1	CCDC147	2144.13	40.2435	-5.70076	0.0182388
TR135328|c0_g1_i1	ARMC12	4874.99	6.23869	-9.39575	0.000340413
TR109580|c0_g1_i2	SH3PXD2A	33.9154	901.451	4.69191	0.0429315
TR130967|c1_g2_i4	DDI2	547.42	12813.9	4.54639	0.0355118
TR127241|c7_g1_i5	ARFGEF3	82.1565	3057.01	5.20062	0.0261813
TR126194|c0_g1_i2	EFCAB6	5167.77	139.604	-5.20012	0.0434141
TR162563|c0_g3_i1	TLR3	73.1457	0.259138	-5.87985	0.00871803
TR121054|c7_g2_i7	TRIM15	2.38153	255.387	6.24451	0.0156585
TR130329|c0_g1_i1	klhl40	1820.71	0.802734	-9.98089	0.00022184
TR113777|c0_g3_i1	chchd6-b	261.693	0	-8.03724	0.000494656
TR103896|c0_g1_i1	C12orf60	12957.7	14.2367	-9.73215	0.00594114
TR86391|c0_g1_i1	KCNK1	50.7737	3495.82	6.07768	0.00976532
TR156061|c0_g1_i2	OBSCN	758.435	3.12548	-7.52422	0.00225416
TR126050|c0_g1_i1	C1orf189	2231.65	4.38635	-8.69523	0.0005805
TR94219|c0_g2_i2	TMEM244	49.1864	0	-5.64922	0.00886818
TR121171|c4_g5_i1	IRAK1BP1	864.771	0.865639	-8.85817	0.000285609
TR83992|c1_g2_i3	UBE2U	6778.02	5.72041	-9.97831	0.000230892
TR117296|c0_g3_i1	IER5	0	912.731	9.83563	0.0136959
TR141574|c0_g1_i1	ZCCHC6	69.1803	0	-6.13299	0.00442021
TR118924|c0_g2_i1	TEX36	3686.23	5.59658	-9.1266	0.000407847
TR84314|c0_g2_i4	ERICH6B	446.074	1.81673	-7.31034	0.00194397
TR109896|c0_g1_i1	tmem82	26.1315	4808.65	7.46982	0.00211102
TR128823|c0_g2_i1	Tprn	3.49544	154.519	5.11249	0.0292613
TR148843|c0_g1_i1	Rnf167	15880.6	13.0673	-10.1408	0.000230584
TR148690|c0_g5_i1	CKM	2.07008	83.1148	4.77601	0.033353
TR115532|c2_g1_i1	MSANTD2	84.1394	5483.2	6.00931	0.0119908
TR91749|c1_g3_i1	DDX39B	96.7621	0	-6.6112	0.0130783
TR108471|c0_g1_i1	MAP7	60.7798	3319.83	5.74826	0.0162564
TR90838|c0_g2_i7	APMAP	314.023	3.73198	-6.05687	0.0105905
TR140727|c0_g3_i1	MRPS6	0	324.244	8.34538	0.000419436
TR144309|c0_g1_i1	MIB2	204.96	6349.54	4.94644	0.0412766
TR174356|c1_g1_i1	PQLC2	145.907	7318.95	5.63886	0.0191862
TR89193|c0_g1_i1	RBM38	75.5946	2906.26	5.24627	0.0316745
TR120709|c0_g1_i1	BDH1	40.371	1640.69	5.31042	0.0257943
TR25002|c0_g1_i1	POLE2	343.013	6.06145	-5.60636	0.022964
TR161383|c0_g1_i2	ESRP2	34.5464	1735.02	5.60994	0.0194218
TR146641|c0_g1_i2	XPO7	0.259098	51.3797	5.37855	0.0222093
TR114356|c0_g1_i1	N4BP3	100.274	5069.04	5.64566	0.0190113
TR91892|c1_g3_i1	PLEKHJ1	2.5876	213.776	5.90367	0.0427739
TR141424|c0_g1_i1	PHAX	0	3179.28	11.6349	0.000181841
TR125786|c0_g1_i1	OLA1	0	935.507	9.87115	0.00734408
TR108142|c0_g9_i1	EDF1	499.348	0.777414	-8.13701	0.00692009
TR126137|c0_g2_i1	ANP32B	0	115.07	6.85885	0.00247124
TR101345|c3_g1_i1	ACTG1	0.284937	528.66	8.68723	0.00039398
TR160589|c1_g4_i1	PPP4R2	3.88309	647.778	7.05379	0.00231473
TR168309|c0_g1_i4	BAIAP2	419.584	18728.2	5.47675	0.0240336
TR147704|c0_g1_i2	ACRBP	1130.38	17.1885	-5.95891	0.0133871
TR85035|c0_g1_i2	NKX6-1	1.32065	386.792	7.38461	0.00299423
TR91481|c0_g1_i1	Cldn11	16140.8	354.441	-5.50505	0.0212608
TR96603|c0_g1_i3	Klf2	10.8767	4299.9	8.50036	0.000658924
TR160214|c0_g1_i1	Olfr142	30.2498	0	-4.96577	0.0267649
TR91522|c2_g1_i1	Vav2	8.93173	279.03	4.81739	0.0399263
TR130543|c0_g1_i1	Sim1	1.8375	105.071	5.22427	0.0187668
TR153134|c2_g1_i1	Tssk1b	19611.5	17.6048	-10.0419	0.0197725
TR151155|c0_g2_i1	Ereg	0	64.8766	6.04169	0.00676656
TR109328|c1_g4_i2	Zp1	2.4604	3227.26	9.8656	0.000230892
TR131860|c4_g2_i1	Trim27	5.51519	856.044	7.03942	0.00280053
TR108947|c0_g1_i1	Nlgn1	10.7162	2710.24	7.8543	0.000904936
TR143984|c0_g1_i1	Unc13c	181.501	0.259138	-7.17933	0.00177654
TR109351|c0_g2_i1	Nell1	0	32.6648	5.07317	0.0294608
TR109141|c7_g1_i1	A1m	43.9201	0	-5.48929	0.0128984
TR85395|c0_g1_i1	Dnah7	2989.66	56.4386	-5.7023	0.01723
TR155696|c7_g1_i1	Mcf2l	146.976	0	-7.20922	0.0295736
TR119628|c0_g1_i4	Otx1	6.94055	3862.59	8.92649	0.000413466
TR149459|c0_g4_i7	Col7a1	962.955	18.0415	-5.66174	0.0226306
TR131674|c0_g3_i4	Npdc1	303.406	0.853373	-7.3597	0.00135698
TR154666|c0_g1_i3	Tbr1	1.63143	575.704	7.77584	0.00117498
TR84224|c1_g1_i8	Sqstm1	0	54.0067	5.78153	0.00934433
TR108881|c0_g1_i1	Cyp4b1	1.03504	131.945	6.02963	0.00601328
TR114627|c1_g1_i1	Hist1h2bb	46611.2	52.8878	-9.75653	0.000744437
TR147711|c0_g1_i1	Ugt8	100.021	8299.03	6.36039	0.00843033
TR121414|c1_g1_i1	Col11a2	630.288	17.8769	-5.0636	0.0396628
TR95118|c0_g1_i3	FAM154B	6309.21	8.47242	-9.37974	0.00836673
TR161711|c0_g1_i1	Ctnna3	2.40805	99.2502	4.87852	0.0407683
TR144021|c1_g3_i1	Erich2	1368.66	39.3715	-5.08434	0.0450472
TR103197|c2_g6_i1	Itpripl1	5365.65	10.9253	-8.81385	0.00215685
TR174401|c0_g1_i1	Ggn	7482.32	43.0948	-7.40693	0.00241156
TR94168|c0_g1_i1	Tsga10ip	5543.02	10.6872	-8.88987	0.00185551
TR148262|c0_g3_i1	GDF9	21.2902	11568.9	9.01975	0.000444767
TR126737|c7_g1_i1	LARGE	73.7967	0	-6.2249	0.00480054
TR162716|c1_g2_i6	MROH7	1491.58	4.01367	-8.21772	0.00103602
TR90299|c0_g1_i2	HAUS3	20.7666	2381.42	6.77417	0.00423245
TR138504|c3_g3_i3	PLA2G4F	1524.45	21.133	-6.10689	0.0134943
TR138457|c0_g1_i1	Tmem178a	111.999	7819.48	6.11288	0.0103713
TR109726|c3_g2_i5	LHX8	6.96639	2515.74	8.30342	0.000761863
TR152552|c0_g1_i2	EVA1C	52.3051	0.518276	-5.13377	0.0373185
TR126500|c0_g1_i2	KCTD11	11.3948	726.442	5.87502	0.0145447
TR168275|c1_g1_i9	Myof	1148.5	32.3736	-5.10616	0.0493698
TR89867|c1_g3_i1	Tmcc1	889.861	9.15765	-6.45456	0.00493462
TR138191|c1_g1_i1	cdc42se2-b	172.814	6039.31	5.11901	0.035758
TR167343|c0_g1_i5	Slfnl1	1388.31	8.55115	-7.18448	0.00331855
TR167738|c1_g7_i1	Prss54	70.2533	0	-6.15489	0.00381528
TR73833|c1_g1_i1	Ccer1	11262.1	17.2198	-9.27189	0.000348273
TR162955|c2_g2_i5	Irgc	92.3142	0	-6.54403	0.00296439
TR171274|c0_g3_i1	mrpl15	0	62.8177	5.99589	0.00750243
TR130323|c0_g1_i4	DUSP13	890.764	2.45884	-8.01023	0.00111058
TR115203|c0_g1_i4	gpr54	9.47444	1610.23	7.26515	0.00196586
TR111696|c0_g4_i1	dnd1	0	39.2362	5.33042	0.0177467
TR138519|c0_g1_i1	vwa2	26.8258	820.943	4.88454	0.0462143
TR83956|c0_g1_i1	epabp	36.8742	3724.6	6.62011	0.00523621
TR118800|c0_g1_i4	dhdh	0.284937	40.0789	4.99863	0.0387022
TR162670|c0_g2_i9	znf395	21.6691	978.329	5.433	0.0190326
TR149268|c2_g2_i1	slc38a9	103.215	3216.58	4.94834	0.0380696
TR114884|c0_g1_i1	cldn7a	5.85181	2608.23	8.57292	0.00261827
TR154107|c0_g1_i1	RLTPR	1357.24	19.5077	-6.04942	0.0158978
TR166501|c0_g1_i1	HIST2H2AA3	0	50.5445	5.68775	0.011102
TR91130|c0_g1_i1	mkrn2	59.732	7376.08	6.92445	0.00334156
TR129683|c0_g3_i2	acsf3	5233.38	6.63314	-9.42153	0.00334048
TR148007|c0_g2_i1	h2afx	47854.8	37.2616	-10.2886	0.00100065
TR108933|c0_g1_i8	XAF1	14062.4	109.547	-6.99114	0.0444555
TR126938|c0_g1_i1	mfsd8	57.5163	1768.18	4.91809	0.046585
TR121435|c2_g1_i1	Astl	82.7391	67278.8	9.65006	0.000251525
TR162467|c1_g1_i2	NEIL2	69.4008	3167.95	5.49227	0.0223546
TR126399|c1_g1_i1	Rasl11a	68.2658	4668.82	6.07508	0.0111693
TR168220|c3_g1_i1	frrs1	0	494.624	8.9531	0.000246597
TR173693|c0_g4_i1	RAB12	0	154.076	7.27683	0.00365781
TR82491|c0_g1_i1	mrpl23	118.084	0	-6.89584	0.00214121
TR91753|c0_g2_i2	ch3-II	7.79739	769.724	6.45299	0.00790142
TR85304|c0_g1_i1	Btnl2	348.067	8.02615	-5.27325	0.0221898
TR144650|c0_g1_i9	sas6	50.9748	2120.44	5.35109	0.0316902
TR131737|c0_g1_i1	pqlc1	27.0889	0	-4.81193	0.0349111
TR108964|c0_g1_i4	tmem45b	2.84737	2772.55	9.49364	0.000230892
TR136813|c0_g1_i1	CCDC70	14001.5	21.7703	-9.26431	0.00038464
TR148764|c4_g1_i1	SLC18B1	37.325	1550.41	5.33915	0.0317814
TR116989|c0_g1_i1	NIPAL1	1698.87	8.64689	-7.46115	0.00271964
TR174436|c2_g1_i1	ZNF774	8.67669	834.542	6.43206	0.00804054
TR130052|c0_g1_i1	ESRP1	5.98371	3457.11	8.95177	0.000462708
TR233427|c0_g1_i1	ier5l	44.1493	2146.36	5.57171	0.0195558
TR112854|c0_g1_i1	gjc1	15.5575	1360.56	6.36164	0.00563213
TR143071|c0_g1_i1	C1orf94	2619.75	3.96303	-9.04454	0.000415611
TR90548|c0_g1_i2	XRRA1	8562.37	55.7071	-7.2385	0.00371601
TR155670|c0_g1_i4	GNN	95.0553	1.21023	-5.44159	0.0187442
TR109384|c0_g3_i2	C16orf46	4662.47	96.4507	-5.58059	0.0244085
TR163046|c7_g1_i1	ZNF585A	27.329	4020.03	7.14914	0.00392503
TR147737|c0_g1_i1	ak8	5761.24	10.7698	-8.93539	0.00047871
TR95916|c0_g1_i2	TMEM81	155.335	3.26434	-5.19617	0.0316304
TR126294|c0_g1_i2	ppp1r3cb	108.594	3389.79	4.95138	0.0486965
TR161283|c1_g1_i1	mtfp1	453.115	25388.8	5.80505	0.0177274
TR143043|c0_g1_i3	TEX38	4327.42	5.90636	-9.2917	0.000332966
TR174007|c0_g1_i8	Nyap1	111.563	1.54533	-5.46673	0.0253086
TR141535|c0_g1_i1	tmem56-b	291.848	0	-8.19401	0.00038464
TR167390|c3_g2_i1	nr2f1b	85.6429	1.29569	-5.23808	0.0336197
TR113647|c0_g1_i3	ZPBP1	1296.63	3.0784	-8.31366	0.000989921
TR159460|c0_g1_i1	CORO6	12.3789	613.066	5.52036	0.0241639
TR85748|c3_g2_i1	ZBED9	106.2	0.518276	-6.14173	0.00831952
TR89186|c0_g1_i1	CDH1	20.7408	920.161	5.40498	0.0237263
TR155396|c0_g2_i1	heg	9.97285	561.897	5.68086	0.0229152
TR76207|c0_g1_i1	RPS23	0	110.951	6.80673	0.00257174
TR155527|c4_g3_i3	USP7	1074.49	1.03655	-9.04465	0.00038464
TR98759|c0_g1_i1	TEPP	3975.79	3.53298	-9.77693	0.0149349
TR126586|c0_g1_i1	CD164L2	23.1045	3819.74	7.30841	0.00296229
TR155718|c1_g2_i4	ENPP7	0.284937	67.6824	5.74017	0.0123603
TR173237|c0_g1_i1	LRIG3	77.2344	3569.55	5.5122	0.0185542
TR149649|c0_g1_i1	C2orf66	49.6616	0.568915	-5.01305	0.0397556
TR114167|c0_g1_i1	Znf474	13506.5	18.54	-9.43311	0.000309743
TR96537|c0_g1_i1	Ranbp10	33.0367	0	-5.08902	0.0280877
TR131618|c0_g3_i4	CHRDL2	1065.22	10.0047	-6.59824	0.00493185
TR162742|c0_g2_i4	ZPBP2	2268.04	5.1515	-8.52693	0.000777189
TR138458|c6_g2_i6	RBMS3	22.5517	752	4.99875	0.0339498
TR103864|c0_g1_i2	TPTE2	760.16	22433.4	4.88137	0.0491712
TR159047|c0_g1_i1	COX6B2	2218.64	2.64479	-9.25028	0.000493946
TR138736|c10_g11_i1	ZNF783	0.51752	43.8046	4.88386	0.0293584
TR101832|c1_g1_i1	BNC2	45.8623	1424.3	4.92669	0.040774
TR148872|c0_g2_i1	CCDC81	5153.9	110.476	-5.53114	0.0235176
TR84570|c0_g1_i1	FRRS1	113.745	12745.8	6.79556	0.00491992
TR168192|c0_g1_i1	SPATA31D1	146.257	0	-7.20219	0.00138158
TR126295|c0_g1_i1	WDR87	299.212	0.284458	-7.86868	0.0162025
TR147757|c0_g1_i1	C9orf171	183.409	0.259138	-7.19433	0.0105608
TR167857|c0_g4_i4	PLEKHG7	515.681	1.77915	-7.53849	0.00192989
TR162943|c1_g1_i1	TMEM136	50.2723	7918.91	7.27116	0.00296439
TR143966|c0_g1_i1	FAM196A	564.343	18.2354	-4.87729	0.045147
TR137795|c0_g1_i3	SLC25A48	796.162	0.828053	-8.76842	0.000456913
TR174421|c0_g1_i1	RASSF6	4862.37	25.1498	-7.53901	0.00237953
TR162871|c1_g1_i5	C12orf63	2972.75	27.4342	-6.70851	0.0062052
TR121376|c44_g38_i1	FAM205A	892.736	1.77915	-8.32906	0.000734697
TR167845|c11_g2_i1	MROH5	25994.2	89.2641	-8.16988	0.000883681
TR144860|c15_g9_i1	SPATA31D4	142.584	0.568915	-6.51599	0.00548168
TR10758|c0_g1_i1	C3orf62	1970.22	4.8164	-8.40474	0.000840102
TR84013|c1_g3_i3	RFX8	1112.46	11.5817	-6.46759	0.00595882
TR155515|c5_g1_i2	STOX1	7.40707	296.035	5.14289	0.0371807
TR109680|c0_g1_i1	KCTD8	8.10144	361.718	5.31661	0.0211735
TR109213|c1_g1_i2	NEK10	2641.9	48.2281	-5.7465	0.0199955
TR89221|c0_g1_i2	Syne2	204.599	5.45772	-4.99267	0.0457489
TR162898|c1_g1_i6	foxj1-b	129.334	4334.6	5.05595	0.0411051
TR21554|c0_g1_i1	FAM57B	557.639	17.1407	-4.94462	0.0397323
TR175070|c4_g4_i3	BHLHE22	30.6797	3025.72	6.57805	0.00474057
TR113822|c0_g1_i2	Ano5	73.8014	1.29569	-5.02607	0.0474682
TR114631|c0_g1_i2	SPATC1	24521.2	30.3302	-9.61232	0.00441599
TR144386|c8_g19_i1	BTN2A1	0	74.4983	6.23837	0.028238
TR167775|c0_g2_i7	LINGO2	4.48015	192.127	5.13919	0.0353778
TR144859|c20_g12_i1	TY3B-I	100.159	0	-6.66049	0.00251699
TR131869|c0_g4_i1	Mroh2b	69.7431	0.259138	-5.81208	0.0146499
TR97677|c0_g1_i1	OVCH1	109.632	3753.64	5.08484	0.0331324
TR86177|c0_g1_i1	calub	0.569874	59.7382	5.27388	0.0267293
TR204233|c0_g1_i1	lsm11	2.35704	153.551	5.52475	0.0240336
TR144606|c2_g4_i4	KCNA10	8.34075	375.291	5.33217	0.0322474
TR153168|c0_g1_i1	Ap1s3	50.8375	1708.27	5.04324	0.0412214
TR129803|c0_g1_i3	Peg10	0.518195	133.23	6.46621	0.00592706
TR127187|c3_g1_i1	Znf250	5.879	1333.1	7.59945	0.00171192
TR144810|c18_g1_i1	Igsf1	0	49.5032	5.6583	0.0314142
TR121154|c0_g1_i5	Zfp184	91.335	6398.24	6.11488	0.0104672
TR162429|c1_g2_i2	Igsf5	2177.23	1.63079	-9.69345	0.0142726
TR162965|c3_g2_i1	Arfgef2	0	42.5508	5.44463	0.0139679
TR101833|c0_g2_i1	Moxd2	481.942	4.8164	-6.37558	0.00833899
TR130900|c4_g2_i6	IL1RAPL1	19.6561	692.848	5.06998	0.0379412
TR131860|c4_g12_i1	TRIM10	12.7856	493.822	5.16567	0.020282
TR85639|c0_g1_i2	IER3	55.1368	4885.53	6.44372	0.0072349
TR144693|c2_g1_i4	MAOB	20.045	1136	5.75561	0.0170112
TR144100|c0_g1_i1	SOCS2	70.6439	4080.51	5.83212	0.0181493
TR108527|c0_g2_i1	DFNA5	147.703	7513.99	5.65926	0.0193279
TR149872|c0_g1_i1	SLC36A1	108.344	8120.75	6.21484	0.00832857
TR97706|c0_g2_i2	GVINP1	559.63	4.58258	-6.64997	0.00629801
TR127167|c1_g1_i3	TIPARP	4214.76	10.6911	-8.49423	0.000704626
TR88078|c0_g2_i1	PKD1L2	2.35637	629.004	7.55232	0.0014891
TR115141|c0_g1_i2	GRASP	97.5019	8907.68	6.49892	0.00541538
TR152726|c2_g7_i1	MROH2B	321.037	0.259138	-7.99864	0.000838337
TR88756|c1_g1_i1	rps3a-a	240.908	0.284458	-7.55715	0.00868368
TR130529|c0_g2_i1	Ccdc37	2088.64	14.9793	-7.0309	0.00401103
TR131614|c2_g3_i1	Dfnb31	0.259098	97.0417	6.28293	0.00711171
TR96954|c0_g2_i3	Abcc12	1045.77	5.77105	-7.27234	0.00238972
TR155507|c3_g3_i7	Clec2e	0	210.433	7.72406	0.0194448
TR121078|c1_g6_i1	Pqlc1	148.282	0.518276	-6.61946	0.00430027
TR155879|c1_g2_i1	Arhgap11a	13.1303	3650.21	8.01344	0.00111984
TR121015|c0_g1_i2	Elac2	215.679	7814.19	5.17265	0.0319487
TR166273|c0_g1_i2	Klhdc1	38.7905	2135.24	5.74651	0.0159324
TR120899|c2_g4_i8	Nfasc	218.218	3.59588	-5.57588	0.0224774
TR138812|c0_g1_i6	ADCY10	379.431	7.13163	-5.54795	0.0136431
TR166705|c0_g1_i1	ZAR1	54.7907	14658.7	8.03761	0.00100257
TR99911|c0_g1_i1	PEG10	0	25.1803	4.71041	0.044264
TR130615|c3_g1_i2	ZNF546	13.133	1428	6.6598	0.00623116
TR103090|c1_g1_i2	RTN4RL2	2.12243	1798.62	9.1708	0.000251525
TR161816|c0_g1_i1	PIM3	36.3818	2594.41	6.11748	0.0101982
TR55162|c0_g1_i1	IGFN1	309.204	3.31221	-6.16865	0.0127816
TR95006|c0_g1_i4	LRRTM4	16.4707	846.49	5.60019	0.0191978
TR144674|c3_g1_i2	IQGAP3	47.0151	1754.98	5.19264	0.0241367
TR121111|c0_g1_i6	SGMS1	965.934	8.77943	-6.62752	0.00809209
TR115239|c4_g2_i5	ZSCAN30	4.55902	288.491	5.70255	0.0190188
TR108085|c0_g1_i1	TRIM69	10682.6	11.4934	-9.74001	0.0178862
TR138262|c2_g1_i2	TEN1	53.0109	2978.52	5.78568	0.0155244
TR167184|c2_g4_i4	HEATR4	1892.21	21.5322	-6.39271	0.00939649
TR120827|c0_g1_i2	GAS2L3	34.107	3163.58	6.49411	0.00675762
TR144145|c0_g1_i2	CATSPER3	1235	1.72851	-8.82335	0.000456913
TR155520|c0_g1_i2	VPS37D	50.9137	3657.52	6.139	0.0101977
TR142955|c0_g1_i2	NME9	968.694	26.4676	-5.14172	0.0464085
TR97397|c0_g1_i3	CDC20B	654.781	1.88992	-7.82604	0.0013261
TR142541|c0_g1_i1	CACUL1	505.859	0	-8.98544	0.000230892
TR102102|c0_g1_i9	KRT73	136.667	0.259138	-6.77261	0.00270543
TR103523|c0_g1_i1	SGK223	137.679	4517.06	5.02588	0.0362635
TR102402|c0_g1_i1	KLB	49.5632	2199.53	5.44362	0.0223707
TR97205|c8_g6_i5	PCM1	674.185	3.92821	-7.09807	0.00377773
TR130813|c0_g2_i4	MUSK	261.918	0.259138	-7.70603	0.00104765
TR173952|c0_g1_i1	TMEM229B	0	28.718	4.89326	0.0487571
TR147990|c0_g1_i2	Dcaf12	75.8573	0.284458	-5.90295	0.0117463
TR158640|c0_g1_i1	Krt75	55.5284	0.43282	-5.30205	0.0161646
TR123323|c0_g1_i1	Nrd1	418.602	1.29569	-7.51395	0.00185464
TR130060|c0_g1_i1	Cggbp1	204.632	1.29569	-6.485	0.00718896
TR85568|c0_g1_i1	Nutm1	1818.24	5.10086	-8.22011	0.000994111
TR120808|c0_g3_i1	Slc17a6	0	48.2669	5.62255	0.011806
TR130953|c0_g1_i2	Slc7a4	16.6768	747.492	5.40406	0.0256826
TR131188|c0_g5_i1	Larp6	1.6321	3714.41	10.4631	0.00022184
TR125771|c0_g1_i3	Athl1	978.327	6.83768	-6.96522	0.0233298
TR166752|c0_g6_i1	Daam1	39.7883	0	-5.35008	0.0268948
TR157351|c0_g1_i1	Sgsm1	268.425	0.828053	-7.20343	0.00691476
TR162858|c1_g1_i4	Kirrel3	10.0742	1028.86	6.5391	0.00659528
TR166833|c0_g2_i1	Plekha1	0.518195	81.296	5.76039	0.01538
TR168101|c0_g1_i1	Klhl31	6.11226	4958.4	9.44564	0.000285609
TR128230|c0_g1_i1	Skor1	8.96095	6017.77	9.23897	0.000340413
TR90278|c0_g1_i4	Bri3bp	8534.87	216.272	-5.29597	0.0410849
TR121329|c4_g1_i2	Ctxn3	196.378	2.1997	-5.94688	0.01279
TR100887|c0_g1_i13	Lrrc19	67.2981	0.543596	-5.46748	0.0223112
TR97792|c0_g2_i1	Sowahb	1.63143	1243.29	8.88526	0.00038464
TR168238|c5_g2_i2	Lrrc4c	13.9042	472.041	4.98817	0.0371033
TR115295|c0_g1_i1	Tiparp	1915.14	5.55544	-8.19129	0.00100214
TR148775|c0_g2_i1	Tssk5	2961.87	15.2733	-7.50834	0.0125228
TR103459|c0_g1_i3	Proser2	28.3777	2331.43	6.31097	0.00720452
TR108962|c0_g5_i3	Ky	151.222	1.69369	-5.82045	0.0123055
TR90379|c3_g2_i1	Fam163a	0	25.4252	4.72384	0.0402711
TR83961|c1_g1_i1	Gpc5	0.518195	56.8888	5.25286	0.0299281
TR132315|c0_g1_i1	Tceb3	215.885	7121.1	5.0373	0.0408253
TR144797|c1_g1_i1	E4f1	0	58.7926	5.9019	0.00798291
TR103233|c0_g1_i2	Pabpn1	8.49446	4916.82	9.01672	0.000407847
TR162446|c0_g1_i1	Sertm1	10.4598	462.291	5.33726	0.0220596
TR96930|c2_g1_i3	Ccin	10189.6	18.7671	-9.00992	0.00157187
TR167762|c0_g1_i5	Agbl2	3630.79	32.1774	-6.77434	0.00517598
TR137826|c0_g1_i2	Fbxl13	2443.1	38.0311	-5.96854	0.0151496
TR114320|c0_g1_i3	Ccdc28b	65.2912	3349.67	5.65949	0.0200934
TR121537|c0_g1_i1	Kctd2	0	29.552	4.93319	0.0321612
TR128893|c1_g2_i1	Myl6b	907.536	0	-9.8274	0.00022184
TR126344|c0_g5_i5	Bmper	7.58527	241.133	4.81779	0.0472533
TR130609|c1_g1_i1	MINA	78.0795	4694.34	5.89178	0.0138005
TR162603|c5_g9_i2	SPPL2C	209.687	0	-7.71895	0.0470921
TR162360|c0_g3_i1	CILP2	0.518195	97.994	6.02691	0.0276388
TR148769|c2_g2_i1	EGFL6	1013.19	18.1713	-5.72524	0.0162564
TR115609|c1_g9_i1	NOSTRIN	0	63.5429	6.01219	0.0243971
TR127307|c6_g1_i2	IGDCC3	1.57907	503.413	7.61161	0.0010591
TR126587|c0_g2_i1	CDKL3	130.737	0.284458	-6.68036	0.0034851
TR113474|c0_g6_i1	VSTM4	174.282	0.568915	-6.80377	0.0041002
TR103195|c0_g1_i1	ARHGEF19	13.3391	5653.85	8.62339	0.000649798
TR126443|c0_g1_i2	TEX14	3272.77	40.6712	-6.29576	0.00864171
TR130975|c0_g1_i3	WDR63	1977.73	15.0775	-6.94339	0.00431192
TR114833|c0_g4_i4	BRSK2	0.802457	126.429	6.14359	0.0109729
TR174755|c4_g7_i1	SGPP2	48.7571	0	-5.63683	0.0352261
TR148774|c3_g3_i4	ZSCAN29	36.7101	0	-5.23688	0.0419659
TR104074|c0_g1_i1	TRIM42	2021.19	4.50939	-8.51981	0.00253783
TR159073|c0_g1_i1	HOMEZ	0	1649.93	10.6891	0.00491662
TR102869|c0_g2_i1	TP53INP2	420.922	0	-8.72083	0.000285609
TR147826|c0_g1_i1	PARP9	189.124	1.42229	-6.29442	0.00736621
TR148873|c0_g1_i1	CCDC135	5064.35	108.857	-5.52696	0.0189133
TR103521|c1_g3_i1	EFCAB13	2750.18	16.5037	-7.29624	0.0380647
TR87059|c0_g2_i2	TMEM192	295.355	9846.02	5.05429	0.0411006
TR109504|c0_g1_i1	SYTL1	2607.85	86.0155	-4.906	0.0439157
TR136788|c1_g1_i1	FAM186B	332.095	3.85225	-6.10114	0.0121575
TR126590|c1_g2_i8	CCDC170	386.034	5.58432	-5.87728	0.0197045
TR174437|c0_g1_i2	ENTHD1	3749.3	11.8764	-8.18613	0.000982515
TR70882|c0_g1_i1	TBC1D21	11674.6	25.8853	-8.76246	0.00407777
TR161682|c1_g1_i1	DND1	380.782	14765.3	5.27341	0.0303913
TR96457|c1_g1_i1	PRR22	3923.97	3.28334	-9.83973	0.00116198
TR154133|c0_g1_i5	GPR112	277.914	3.33398	-6.00799	0.0149552
TR61476|c0_g2_i1	ST13P4	109.557	0	-6.78865	0.00216938
TR166195|c0_g1_i1	CMTM8	8.15514	528.563	5.85408	0.0115415
TR167780|c4_g2_i1	RGMA	41.4305	1253.61	4.88599	0.0411245
TR95878|c0_g1_i2	birc7-a	26.0281	7319.01	8.08124	0.00108877
TR128344|c0_g1_i1	Rtn1	3981.39	4.28784	-9.55674	0.0062747
TR97399|c0_g2_i2	Myo3a	272.994	1.08719	-7.03644	0.0030901
TR30396|c0_g1_i1	Npb	2.38288	173.855	5.69176	0.0192384
TR105613|c0_g1_i2	KLRF1	238.705	0.284458	-7.54396	0.00117498
TR91343|c18_g6_i3	PRKACA	35.3156	0	-5.18252	0.0241217
TR107898|c0_g1_i1	FMR1NB	321.406	0.802734	-7.48255	0.0144979
TR114954|c0_g5_i1	C1orf158	4447.76	8.82255	-8.82309	0.0237161
TR97636|c2_g1_i1	SIX6OS1	2835.26	57.7948	-5.59216	0.0263994
TR115596|c1_g3_i2	DOCK4	80.9808	0	-6.35721	0.00464478
TR131667|c0_g1_i2	ANKRD35	199.967	4.03899	-5.31768	0.0424612
TR162781|c0_g1_i1	GPR137C	338.847	10209.2	4.90899	0.0442094
TR175227|c1_g1_i1	PGBD5	0.51752	51.1973	5.10419	0.023017
TR94453|c0_g1_i3	C17orf78	2958.48	2.4082	-9.76212	0.000991617
TR144187|c2_g5_i8	RNF175	1.68378	902.347	8.39487	0.00482361
TR166022|c0_g1_i2	LRRC71	13270.5	114.584	-6.84325	0.00586769
TR167204|c0_g2_i4	MARVELD2	279.103	2.52175	-6.31352	0.00695669
TR102818|c0_g1_i3	AFAP1L2	63.0261	2030.61	4.98782	0.0372169
TR148393|c0_g1_i1	MREG	77.7157	3613	5.5208	0.021565
TR174938|c0_g1_i1	ARRDC1	396.875	18135.2	5.51041	0.0200358
TR100806|c0_g1_i1	C11orf42	1640.79	0.568915	-10.0313	0.00397141
TR127282|c1_g6_i2	ADAMTSL1	0.284937	43.2772	5.10679	0.0462604
TR91818|c7_g2_i1	ZFAND2A	26.3641	1998.68	6.19135	0.00960747
TR126487|c0_g1_i1	CCDC185	21231.5	520.503	-5.34746	0.0366394
TR127140|c9_g12_i2	LRRC52	498.788	0.568915	-8.3154	0.000651672
TR138311|c0_g1_i1	FAM216B	59.0823	0.259138	-5.57643	0.0132545
TR138681|c0_g1_i7	ANKRD31	542.223	12.1292	-5.37069	0.0270857
TR143714|c0_g1_i2	C2orf61	5642.33	3.99112	-10.143	0.00362377
TR147625|c0_g1_i2	VGLL2	20.7455	801.029	5.20487	0.0340794
TR109817|c0_g5_i1	PRELID2	0.518195	266.847	7.46291	0.00152299
TR102700|c1_g11_i1	EXD3	34.145	0	-5.13525	0.0399263
TR138153|c1_g1_i4	TC2N	41.3053	3571.95	6.40013	0.00748604
TR174044|c0_g1_i2	CCDC63	3546.74	42.442	-6.35166	0.00884606
TR62164|c0_g1_i1	SPERT	28157.4	19.6494	-10.4133	0.00231473
TR96334|c0_g1_i4	MARCH10	24087.2	162.224	-7.20533	0.0464518
TR143984|c1_g1_i3	UNC13C	215.507	1.80447	-6.27054	0.00745687
TR144624|c2_g1_i1	CYB561A3	32.547	969.809	4.85493	0.0426048
TR174319|c0_g1_i4	C11orf65	533.598	2.47111	-7.26691	0.00231184
TR109452|c9_g8_i1	MROH1	147.793	0.543596	-6.59087	0.00675762
TR137259|c2_g1_i2	SLC17A8	50.4029	0.568915	-5.03401	0.032504
TR109938|c4_g3_i6	RGS22	2491.64	55.7332	-5.45734	0.0385391
TR144394|c0_g1_i4	NSUN7	7095.35	149.856	-5.55583	0.0259589
TR166049|c1_g7_i1	SETD9	92.6507	0	-6.54922	0.00236816
TR153486|c1_g1_i1	HIPK4	2788.25	60.3815	-5.50593	0.0233657
TR114987|c1_g1_i2	C7orf57	15795.4	384.664	-5.35611	0.0307305
TR130205|c0_g1_i1	FAM46D	40603.1	39.4012	-9.97301	0.000286736
TR120868|c0_g2_i1	SHCBP1	36.4865	6791.77	7.50148	0.00186005
TR121269|c0_g1_i8	DBF4B	285.774	11138.6	5.27964	0.031845
TR101325|c0_g1_i1	OR10A7	51.0061	0	-5.70061	0.00748038
TR137859|c0_g1_i1	OR52L1	0	81.9385	6.37397	0.00413181
TR149869|c2_g14_i1	OR52E4	107.806	0.43282	-6.24676	0.00583747
TR149869|c1_g11_i1	OR51G2	83.4479	0.259138	-6.06755	0.0092221
TR149869|c1_g18_i1	OR51G1	76.5373	0	-6.27682	0.00466047
TR125631|c0_g2_i2	OR11L1	36.9279	0	-5.24519	0.0187393
TR102208|c6_g2_i1	OR14A16	0.544035	211.985	7.1079	0.0366605
TR113867|c0_g1_i2	C15orf43	308.704	3.22676	-6.19519	0.00794972
TR57992|c0_g1_i1	DNAJB8	16234.5	11.393	-10.3554	0.00330591
TR162887|c14_g1_i1	NFKBID	7.92324	4556.64	8.9965	0.000381997
TR173624|c0_g1_i1	Bfar	195.928	0.284458	-7.26037	0.00192507
TR149515|c1_g2_i3	Mmd2	868.108	2.90116	-7.79949	0.00156706
TR120714|c0_g1_i1	Pdlim2	213.932	7805.87	5.18279	0.0343367
TR121014|c4_g2_i3	Foxe1	1.55391	355.959	7.12691	0.00247671
TR165117|c0_g2_i1	Gtf3c5	40.3881	0	-5.37114	0.0190113
TR144782|c1_g3_i1	Ubqln1	13256.6	10.2524	-10.2024	0.00298866
TR125115|c0_g1_i1	Ppp1r14c	23.5173	891.706	5.18631	0.0360596
TR148017|c0_g1_i6	Spsb4	38.0921	2232.37	5.8362	0.0131208
TR120395|c1_g2_i1	ATP5J	7629.58	40.8848	-7.50922	0.00227743
TR115496|c0_g1_i6	SGCG	593.193	8.67142	-5.94106	0.0127679
TR173105|c0_g1_i1	RHEBL1	11.9104	1899.68	7.20184	0.00303269
TR175070|c4_g2_i1	OLIG1	63.0241	2381.89	5.21795	0.0278873
TR113991|c1_g1_i1	NEIL3	16.8577	2977.28	7.38179	0.00204257
TR90186|c0_g1_i1	NKX2-3	0	42.9749	5.45861	0.0155591
TR160116|c0_g2_i1	NDNF	6.63113	386.969	5.6679	0.0209691
TR167783|c2_g4_i4	FAM81A	191.369	0.951096	-6.62344	0.00403318
TR120214|c0_g8_i1	TMEM254	0	93.68	6.56499	0.0205592
TR154334|c0_g1_i6	ADAM32	301.382	10.5329	-4.71255	0.0496949
TR114659|c0_g1_i1	FAM71B	531.617	0.853373	-8.1668	0.000804571
TR108922|c0_g1_i2	M1AP	1485.27	6.2379	-7.68191	0.00141372
TR146836|c0_g1_i1	ACTL9	4341.92	4.18735	-9.70945	0.000250158
TR162439|c0_g2_i2	DSCAML1	323.205	3.50766	-6.16838	0.011102
TR109689|c0_g1_i2	MCOLN3	156.159	6088.11	5.27593	0.0338881
TR156011|c3_g2_i2	NETO1	29.7883	3714.7	6.91511	0.00211919
TR175266|c1_g1_i1	ADAMTS19	1.83885	110.081	5.29016	0.0280383
TR97669|c0_g1_i3	SH3TC1	55.3157	2731.09	5.60033	0.0185059
TR115613|c0_g1_i2	AFAP1L1	133.887	10839.1	6.32849	0.00790142
TR144663|c5_g1_i1	SAP25	19.6832	752.737	5.18753	0.0381008
TR127338|c0_g2_i1	CEP192	429.438	0.284458	-8.3885	0.000413466
TR96329|c0_g1_i1	hes7.1-a	0.284937	44.1579	5.13521	0.0290189
TR109205|c0_g1_i1	TBX20	2.97792	227.876	5.84641	0.0134101
TR120919|c0_g1_i2	Ssx2ip	24.1409	4906.51	7.60881	0.00206853
TR109024|c0_g1_i1	Ddit4l	137.83	13262.6	6.57801	0.00533723
TR91175|c0_g1_i1	Acot11	158.496	4872.63	4.93341	0.0490412
TR144726|c5_g3_i2	Asb16	16.1545	932.441	5.7659	0.012489
TR148491|c0_g1_i1	Cspg4	4938.59	81.6391	-5.90142	0.039409
TR74500|c0_g1_i1	Rsph1	3635.04	20.7785	-7.38332	0.00237704
TR89194|c0_g2_i1	H1foo	14.9692	12156.9	9.57239	0.000269839
TR126061|c0_g1_i1	C16orf78	8435.96	13.7082	-9.16396	0.017013
TR109931|c1_g4_i1	SCARB1	663.074	21210.6	4.99737	0.0442524
TR90987|c0_g1_i3	PPP1R13L	17.6602	1096.67	5.87834	0.0130513
TR91791|c0_g1_i1	TMEM255B	6.65494	962.07	6.97511	0.00325216
TR91554|c3_g6_i1	TRIM41	0	48.0303	5.6156	0.0117278
TR91818|c7_g1_i4	ZFAND2B	54.8824	2105.48	5.23629	0.0339498
TR148759|c0_g1_i1	RNF141	852.193	9.3871	-6.36001	0.00995341
TR126027|c0_g1_i1	ZDHHC19	2258.82	9.16992	-7.79576	0.00122024
TR162038|c0_g1_i5	C10orf82	1563.48	14.338	-6.67242	0.00665926
TR84240|c4_g1_i2	NLRP7	3.23769	264.933	5.97164	0.0128524
TR137425|c0_g1_i1	ASB12	371.918	1.92751	-6.99304	0.00267045
TR115128|c0_g2_i9	ADAMTS14	344.947	4.67081	-5.93085	0.0169721
TR102866|c2_g6_i1	AUTS2	1.03571	196.326	6.5989	0.00417841
TR84391|c0_g1_i1	SLC7A3	125.077	9856.55	6.28885	0.00700702
TR120962|c0_g1_i2	TTN	2853.21	33.8335	-6.35647	0.0120327
TR109442|c3_g3_i1	RAPGEF4	0	42.8388	5.45414	0.0137642
TR127309|c5_g3_i9	COL17A1	1384.01	12.1094	-6.72314	0.0154873
TR102690|c0_g1_i5	NKX-2.5	0.569874	950.083	9.24278	0.000275989
TR121036|c1_g1_i3	EEF1A	8.80321	3251.09	8.3739	0.00251699
TR88035|c0_g1_i2	KCNJ3	2.07211	111.261	5.19148	0.0384574
TR120116|c0_g1_i1	LY6E	1.03504	360.667	7.47346	0.00113316
TR115087|c4_g2_i3	foxd2	9.27105	589.85	5.84614	0.0141345
TR103269|c0_g1_i5	jag1b	10.9535	573.097	5.58579	0.0433783
TR138232|c0_g1_i1	rpl32	1.08807	246.27	6.88777	0.00406468
TR126992|c2_g1_i3	NTRK1	8.4183	465.146	5.62917	0.0214307
TR161939|c0_g1_i1	VIPR1	47.4679	1471.25	4.92485	0.0467239
TR102206|c0_g1_i1	mix-b	7.27919	531.688	6.00766	0.0154431
TR91264|c0_g1_i1	chrd	55.0797	3403.96	5.92401	0.0127324
TR129164|c0_g1_i1	Egln3	42.29	2011.9	5.53909	0.0222796
TR162661|c0_g6_i1	Trpv6	11.5798	629.792	5.64798	0.0233626
TR149327|c0_g1_i6	Fam19a5	2.61546	458.585	6.99001	0.00309015
TR97524|c5_g5_i1	Lnx2	2.07211	119.481	5.29344	0.0314323
TR137405|c0_g1_i1	Emr4	14420.4	19.5544	-9.45454	0.000308224
TR85755|c1_g2_i3	Bmf	6.81335	300.798	5.2715	0.0374366
TR155661|c1_g1_i1	Dmbx1	2.9514	744.58	7.55985	0.00140076
TR91392|c3_g1_i1	DNMT1	2.14962	652.954	7.69787	0.0182899
TR154929|c3_g1_i1	CYP11B	3.36557	118.195	4.771	0.0493511
TR102156|c1_g1_i2	CYP19A1	0	125.731	6.98562	0.00182232
TR95964|c0_g1_i1	Imp3	101.95	3702.54	5.16889	0.0331967
TR246456|c0_g1_i1	Tekt2	32.8545	0	-5.08127	0.0291642
TR168290|c0_g2_i1	Smc6	647.633	2.0731	-7.72156	0.0115414
TR103389|c0_g2_i6	PIEZO1	145.462	0.284458	-6.83322	0.00618524
TR147114|c0_g2_i3	GGH	1.32065	122.009	5.72809	0.0142156
TR130825|c0_g1_i1	HOXB13	1.81166	91.872	5.04575	0.0249999
TR109351|c0_g3_i2	NELL1	4.84396	1842.82	8.30154	0.000850269
TR103114|c0_g1_i1	BHMT	56.4792	3142.73	5.77329	0.0160559
TR174280|c0_g1_i6	WNT8B	3.49611	387.016	6.43129	0.00698785
TR168280|c1_g1_i1	Dmbt1	190.153	0.543596	-6.95229	0.00304055
TR174784|c0_g1_i5	BTBD16	2760.42	2.7433	-9.52689	0.000271295
TR148294|c0_g1_i1	CATSPERD	626.473	2.12374	-7.65013	0.00128472
TR120790|c3_g1_i2	CCDC67	7390.2	34.8574	-7.68739	0.00195826
TR85028|c4_g1_i1	DRC1	19644.6	227.373	-6.42667	0.00934983
TR171801|c0_g1_i1	QtsA-12155	5954.29	5.77027	-9.78074	0.0407691
TR90420|c0_g3_i1	FAM71A	7767.01	20.6111	-8.48963	0.0315346
TR173572|c0_g1_i2	PDILT	24.2879	0	-4.66037	0.0489323
TR149211|c0_g1_i1	RTase	998.801	5.2781	-7.31517	0.00286167
TR138722|c0_g1_i2	CNKSR1	108.088	3810.02	5.12661	0.0348894
TR94650|c0_g1_i2	WBP2	823.968	0.43282	-9.16934	0.000578386
TR131842|c3_g2_i2	COL26A1	0	184.421	7.53466	0.000948227
TR120315|c0_g2_i1	FERMT2	1.91637	795.062	8.09256	0.000839986
TR120592|c0_g3_i1	CIDEC	32.5226	17305.9	9.012	0.000399245
TR91180|c1_g1_i1	DACT3	9.52545	353.078	5.07211	0.0255468
TR174686|c0_g1_i2	CHMP4C	36.6211	1267.82	5.0758	0.0425717
TR144583|c5_g1_i1	TIFA	36.4614	5998.59	7.32332	0.00242095
TR113771|c0_g1_i2	NUDT16	12.8685	497.127	5.16663	0.0311802
TR94762|c0_g1_i1	LGALS12	40.1398	1418.02	5.10822	0.0370726
TR158702|c0_g1_i3	C9orf9	41500.7	126.935	-8.34161	0.00958675
TR114931|c0_g1_i1	C11orf24	238.44	8175.94	5.09382	0.0349228
TR144822|c18_g1_i1	TRIM11	3.15882	480.994	6.8567	0.00666153
TR66181|c0_g2_i1	CCDC104	134.444	0	-7.08155	0.00124096
TR126037|c0_g1_i2	PDXP	58.2453	2308.91	5.28499	0.0301852
TR115528|c0_g1_i1	CCDC120	36.7184	1205.96	4.99997	0.0392909
TR167886|c1_g1_i3	GRAMD3	204.718	8429.31	5.35685	0.0234646
TR85027|c0_g1_i1	GPATCH3	245.389	9418.69	5.25667	0.0246558
TR97198|c2_g1_i1	FAM46A	153.858	13733.3	6.4707	0.00683527
TR129480|c0_g1_i1	SHD	161.893	0.951096	-6.3835	0.0356322
TR161255|c0_g1_i1	WNK4	0	30.2222	4.9645	0.0308658
TR95181|c2_g1_i2	HIC2	85.9879	2354.55	4.7591	0.0467174
TR160762|c0_g1_i1	ZNF479	1.57907	83.6034	5.03579	0.0323256
TR148538|c0_g1_i1	CLMN	112.543	0	-6.82709	0.00236816
TR156096|c1_g2_i2	FAM84B	33.3727	3638.81	6.72646	0.00381283
TR144079|c0_g3_i3	PHACTR3	286.227	0.802734	-7.31586	0.0177238
TR162292|c1_g4_i2	C4orf36	4078.73	8.68448	-8.71859	0.00346869
TR155877|c0_g1_i1	ALPK3	68.1691	2083.08	4.91314	0.0499101
TR102657|c0_g1_i1	HSFY1	6488.83	31.7133	-7.63216	0.00212342
TR119055|c0_g1_i1	PPP1R36	921.528	2.38288	-8.0912	0.00477258
TR120998|c0_g2_i1	C9orf72	40.2511	0	-5.36636	0.0133053
TR173904|c1_g1_i1	C10orf90	10567.2	31.3288	-8.3527	0.000852417
TR157119|c0_g1_i2	C3orf30	2162.06	15.7951	-7.00889	0.0045826
TR130132|c0_g1_i13	CCDC7	10289.5	29.9342	-8.3779	0.000887527
TR136848|c0_g2_i1	PACRG	0	201.432	7.6613	0.000740802
TR126905|c3_g1_i1	FAM65C	11.2902	6669.37	9.08412	0.000381997
TR108382|c0_g1_i3	ZNF488	4.48015	252.061	5.52913	0.0225904
TR101312|c1_g2_i1	ZNF641	59.2342	0.518276	-5.31008	0.0340425
TR162482|c0_g1_i2	CLIC6	12.2762	670.579	5.66064	0.0190035
TR131858|c2_g4_i4	ERMAP	18.0444	488.183	4.68294	0.046729
TR130337|c0_g11_i4	CSMD1	2051.11	27.1501	-6.18782	0.0141737
TR154713|c0_g1_i1	DEPDC7	81.8138	5055.42	5.9321	0.0104135
TR128857|c0_g1_i1	HIST1H2AA	3693.12	2.87861	-9.89548	0.0179802
TR155910|c7_g1_i1	OR52B2	64.4182	0.259138	-5.69918	0.0153002
TR171280|c1_g2_i1	ZNF300	96.0106	0	-6.60007	0.0128396
TR90156|c0_g1_i1	IWS1	102.234	0.543596	-6.06348	0.00926537
TR167869|c1_g1_i1	SIN3A	348.134	1.63079	-7.05214	0.00355338
TR144468|c1_g1_i5	KCNK16	90.4442	1.46937	-5.21068	0.0349228
TR155296|c0_g1_i1	GPHA2	964.745	4.8069	-7.37773	0.00306826
TR149331|c8_g2_i1	pcnx	101.126	0	-6.67421	0.00231833
TR97150|c0_g1_i1	MUC5B	425.9	1.65611	-7.32844	0.00205182
TR162945|c2_g1_i1	ldlr-a	57.8633	3469.14	5.88148	0.0223031
TR144859|c20_g7_i1	TY3B-G	2290.49	10.1622	-7.68153	0.00131354
TR137801|c0_g1_i2	AGAP2	35.2162	0.259138	-4.84613	0.0479298
TR89825|c0_g1_i3	CDX2	0.518195	85.1622	5.82662	0.0135301
TR114146|c0_g1_i1	LITAF	139.016	1.08719	-6.06788	0.0182639
TR102179|c0_g1_i1	CDC6	111.267	8002.81	6.15568	0.0112414
TR115456|c3_g2_i1	TXN2	11.7791	309.905	4.60461	0.0484796
TR167872|c0_g5_i1	ARID3A	0	124.932	6.9765	0.00173345
TR115519|c0_g1_i3	Smtnl1	5.6709	204.682	4.94639	0.04227
TR154171|c0_g1_i1	Gins4	47.9888	3346.38	6.09444	0.0112542
TR136814|c0_g1_i1	FABP4	463.066	68681.2	7.20946	0.00236816
TR153619|c0_g1_i1	Nkg7	575.641	1.69369	-7.74194	0.000975348
TR96808|c3_g1_i4	SLC2A12	273.767	6.4369	-5.20736	0.0299281
TR109327|c0_g1_i1	ZP4	27.531	39380.8	10.4308	0.00022184
TR120839|c0_g1_i2	SPOCK3	0.284937	72.1237	5.83057	0.01178
TR147241|c1_g1_i1	KCNS3	7.74301	986.224	6.8191	0.00436077
TR114466|c0_g1_i15	PSD2	2257.85	9.76811	-7.71268	0.00197558
TR98126|c0_g1_i2	OCSTAMP	0	66.6594	6.08022	0.0347924
TR121373|c2_g1_i4	FAM64A	166.518	4083.56	4.60779	0.0496511
TR149310|c0_g2_i1	CRB3	20.825	4378.79	7.64874	0.00191962
TR137775|c0_g1_i1	CHAC1	90.1254	9761.25	6.74322	0.0039
TR124942|c0_g1_i4	FAIM2	305.528	0.518276	-7.65744	0.0244794
TR126082|c2_g1_i9	PAPOLG	64.9692	3837.84	5.86273	0.00874269
TR121120|c0_g1_i3	BOC	194.378	6920.29	5.1467	0.0353778
TR96024|c0_g1_i5	TTLL2	1566	7.93238	-7.45474	0.00215685
TR126408|c1_g1_i2	TSSK6	80203.2	68.7593	-10.1671	0.000917912
TR102686|c0_g1_i1	NT5C1A	1.57975	97.2712	5.25147	0.0350608
TR113448|c0_g1_i1	MAP1LC3C	5.36215	6907.65	10.0847	0.000230584
TR41375|c0_g2_i1	ANKRD60	203.144	0	-7.67344	0.000767473
TR119537|c0_g1_i5	PLA2G2F	2088.64	5.48581	-8.33176	0.000844281
TR89097|c0_g1_i1	CHIA	415.91	2.06361	-7.08836	0.00303307
TR142684|c1_g1_i1	FOXQ1	58.6396	0.828053	-5.02789	0.0353778
TR119274|c0_g1_i1	TRIM7	20.9583	1376.78	5.97144	0.0169858
TR108436|c0_g6_i1	TRIM2	0	205.419	7.68943	0.000769428
TR96156|c1_g1_i6	LRRC27	1191.65	16.0665	-6.12686	0.0129883
TR91799|c4_g1_i4	Lrrc18	16326.8	24.3364	-9.3319	0.00203428
TR104638|c0_g2_i1	Fbxo36	401.212	0	-8.65181	0.000286736
TR79870|c0_g1_i1	Efcab2	1658.12	19.8108	-6.31694	0.00856936
TR109889|c0_g4_i1	Tspan31	0.259098	77.8181	5.96806	0.00967701
TR162926|c2_g5_i1	Ndufa3	98.7559	0.259138	-6.30789	0.0226392
TR132869|c0_g1_i2	Cygb	2632.62	27.846	-6.51253	0.00691476
TR130913|c0_g2_i1	Tbc1d15	13166.2	15.9016	-9.60558	0.000504652
TR166208|c0_g2_i31	Ndufs4	1.96872	242.676	6.35898	0.00884606
TR156693|c0_g1_i1	Gtf2e1	57.485	5744.82	6.6183	0.00487415
TR91767|c2_g1_i4	Upk1a	48.7375	14750.2	8.21228	0.000911834
TR173764|c0_g1_i1	Dcdc2c	7220.96	158.226	-5.50324	0.0288735
TR30146|c0_g1_i1	Tssk3	17816.2	17.6083	-9.90311	0.000309743
TR143461|c0_g1_i1	Rnf128	7716.48	48.3286	-7.28956	0.00335409
TR137808|c0_g1_i1	Mgat4c	4182.05	10.2009	-8.54479	0.000651672
TR131840|c0_g1_i1	Stx11	68.4237	4067.74	5.87301	0.0107122
TR126981|c1_g1_i1	Tssk4	2201.34	23.1594	-6.51031	0.00926168
TR143866|c0_g1_i1	Syce1	2367.32	17.8544	-6.97282	0.00423665
TR147988|c0_g1_i1	Cul2	0	58.3361	5.89084	0.00734616
TR168001|c0_g1_i1	Spata17	2027.69	10.9558	-7.4067	0.00242105
TR166522|c0_g1_i2	Wdr64	2500.25	22.346	-6.74333	0.0127289
TR91895|c10_g1_i1	Clec2g	1.06155	305.825	7.21754	0.00195892
TR85920|c0_g2_i2	Msra	43.9996	1712.47	5.25087	0.0318715
TR131654|c0_g1_i3	Sapcd2	30.4803	4511.62	7.16337	0.0029328
TR113449|c0_g2_i2	Ccdc182	4840.25	6.57023	-9.32083	0.000340413
TR120115|c0_g1_i1	Tex33	89790.7	117.195	-9.56927	0.00122024
TR136789|c0_g1_i1	Actrt2	2354.22	8.46569	-7.95894	0.00109651
TR142701|c0_g1_i1	Spaca3	6620.65	5.46049	-10.0013	0.000230892
TR125615|c0_g1_i1	Thegl	4153.49	15.3469	-7.98951	0.0211997
TR52781|c0_g1_i1	Spaca1	3179.07	30.0809	-6.67688	0.00577059
TR125851|c0_g1_i1	Ccdc89	4279.03	15.8925	-7.9851	0.0013694
TR83995|c0_g1_i1	Lrrc34	1812.99	38.8489	-5.50849	0.0295536
TR113657|c0_g1_i1	Prpf4	3195.88	50.427	-5.958	0.0146881
TR121314|c7_g21_i1	Plin3	0.828972	4112.01	11.1349	0.00022184
TR108600|c1_g2_i1	Rmdn1	212.354	1.70675	-6.30054	0.00934433
TR164960|c0_g1_i3	Lypd2	64.2588	0	-6.0281	0.00516552
TR102854|c0_g1_i1	TENM2	0	27.6905	4.8425	0.0353921
TR282047|c0_g1_i1	GNIH	35.4922	0	-5.18951	0.0384243
TR156095|c2_g1_i1	Npffr1	1.94288	406.66	7.114	0.0112751
TR153109|c1_g1_i1	Rbp7	73.5742	31547.3	8.72467	0.000537381
TR149202|c6_g1_i1	Klf15	56.4467	7931.18	7.10935	0.00280376
TR90533|c0_g1_i1	Irx6	1.06155	76.5777	5.23384	0.0254658
TR47905|c0_g1_i1	Dap3	62.285	0.43282	-5.46493	0.0199003
TR115252|c4_g1_i1	Tubb3	3.13163	383.086	6.53857	0.00362824
TR91408|c1_g1_i4	Prss8	27.2433	1730.58	5.93804	0.0137914
TR114396|c0_g1_i1	Gdpd2	220.273	8353.04	5.23857	0.0377383
TR65268|c0_g1_i1	Trim39	0	43.5189	5.47635	0.0428261
TR12107|c0_g1_i1	Brd4	0.259098	40.1038	5.02881	0.0374173
TR162017|c0_g1_i8	Palld	585.319	4.69257	-6.68646	0.0393525
TR138659|c3_g1_i3	SLC4A4	0	90.913	6.5222	0.00835285
TR102208|c5_g5_i5	OR11A1	94.93	0	-6.58391	0.00363122
TR131799|c0_g7_i1	EIF5A2	516.574	0	-9.01562	0.0453567
TR149307|c0_g1_i1	ADAM19	231.914	0.259138	-7.53122	0.0125918
TR138492|c0_g1_i6	ZMYND15	550.726	0.777414	-8.27803	0.000755196
TR162705|c0_g1_i1	NUAK2	93.6799	21649.5	7.83712	0.00118069
TR155481|c0_g1_i2	KIAA1683	9481.95	4.68663	-10.7035	0.0361352
TR154602|c1_g1_i1	RACGAP1	9.06566	1959.43	7.60558	0.00199186
TR162226|c0_g1_i1	QRICH2	8972.19	91.461	-6.60063	0.00671208
TR174835|c0_g1_i2	PARP12	2.17614	779.496	7.94097	0.00127223
TR142888|c0_g1_i1	ABCG4	0.284937	39.616	4.98228	0.0389104
TR108548|c1_g1_i1	C20orf85	1063.32	2.23729	-8.36094	0.00066335
TR84548|c7_g4_i1	SLC6A17	0.284937	103.826	6.35015	0.0190188
TR85444|c0_g1_i2	MMP28	19.8118	723.188	5.12089	0.0379412
TR129369|c0_g1_i2	NEUROG2	0.259098	123.96	6.63293	0.00370981
TR149869|c2_g8_i1	OR51V1	28.0397	0	-4.85996	0.0395545
TR109823|c0_g1_i5	CDC42EP4	52.7029	3773.23	6.13504	0.0109779
TR155535|c14_g3_i1	ABHD16B	24061.1	14.2079	-10.6277	0.000500083
TR101837|c0_g1_i5	RAD21L1	1401.33	45.5802	-4.91196	0.048784
TR154363|c0_g1_i1	RGCC	108.123	7024.09	6.00849	0.0104112
TR85560|c0_g1_i4	KLHL31	262.788	2.67011	-6.16741	0.00934433
TR120831|c0_g1_i2	CDCP1	88.5068	3743.31	5.38656	0.0239466
TR84404|c1_g1_i5	GREM2	48.9201	11290.5	7.8214	0.000881507
TR143993|c0_g1_i14	CATSPERB	630.352	6.95952	-6.30962	0.00791236
TR175143|c4_g3_i1	TTC12	1.03504	179.293	6.46914	0.00324727
TR96554|c7_g6_i6	ZMAT4	15.6173	837.075	5.65633	0.0187593
TR138228|c0_g1_i1	CNTD2	9.27108	1670.56	7.34646	0.00241409
TR109439|c2_g1_i1	LPHN3	427.037	0.828053	-7.87128	0.00107212
TR129774|c0_g3_i1	C12orf10	0	431.972	8.75813	0.00659475
TR126897|c0_g1_i4	CPNE5	44.0644	0	-5.49392	0.0157739
TR144822|c18_g2_i1	TRIM39	4.68419	297.147	5.71292	0.00958675
TR90493|c0_g1_i1	HRASLS	92.5332	1.34633	-5.317	0.0284962
TR102164|c0_g1_i12	pitx3	5.61855	565.503	6.41942	0.00548526
TR120235|c0_g1_i1	CITED3	379.68	12747.2	5.06557	0.0391149
TR163074|c1_g3_i1	CFC1	2.46108	990.578	8.16236	0.0010228
TR109528|c0_g1_i1	cdt1	139.36	12793.8	6.51028	0.0058759
TR256097|c0_g1_i1	EVX2	0	26.5044	4.78159	0.0430693
TR144187|c2_g2_i1	SFRP2	0	170.522	7.42225	0.00110113
TR161629|c1_g1_i2	VSX2	5.69607	654.146	6.61236	0.00431916
TR153299|c3_g1_i2	SLC24A2	66.6736	1.03655	-5.05439	0.035828
TR120619|c1_g2_i1	celf3	0.777293	128.969	6.19235	0.00936693
TR149188|c1_g5_i8	Ninj2	218.326	4.99285	-5.19369	0.0317832
TR148502|c1_g7_i5	SAT1	5877.44	2.38288	-10.763	0.00038464
TR127093|c2_g3_i8	Ntn4	40.9741	0.259138	-5.05899	0.0300493
TR3539|c0_g1_i1	ACSL1	281.997	2.09842	-6.51311	0.00597955
TR126789|c10_g2_i1	Slc15a1	132.842	1.21023	-5.92019	0.013787
TR138101|c0_g3_i6	Kcnk10	15.8213	1429.98	6.41057	0.00638533
TR128875|c0_g1_i1	Galnt16	11.1059	290.708	4.59074	0.0499101
TR120194|c2_g5_i5	Tmem9b	109.676	0	-6.79019	0.0419644
TR160652|c0_g2_i3	Nrip3	342.491	4.32345	-6.01177	0.0121058
TR127026|c6_g1_i5	Tuba8	20682	15.7765	-10.2678	0.000393993
TR93586|c0_g1_i1	Perp	30.5347	1238.13	5.29624	0.0346668
TR108760|c2_g3_i7	Hcn4	2.1503	545.956	7.43979	0.00241906
TR138544|c0_g1_i1	Chrac1	163.652	0	-7.36328	0.00654982
TR126911|c3_g2_i2	Ldb3	2.9004	3197.77	9.67968	0.00171499
TR90370|c0_g1_i2	Sorcs1	12.0355	387.592	4.89774	0.0290739
TR137152|c1_g1_i1	Theg	1744.88	7.73338	-7.6432	0.00204856
TR174253|c0_g2_i1	At3g20670	6.42371	2629.87	8.46918	0.000747047
TR38283|c0_g1_i1	PDR2	26.9775	0	-4.8062	0.0435106
TR155860|c0_g1_i6	TFRC	1055.41	49654.7	5.55472	0.0181229
TR121439|c8_g11_i1	X-element\ORF2	180.386	1.58292	-6.13392	0.00974634
TR174393|c0_g1_i1	MID1IP1	499.89	0	-8.96835	0.00155007
TR131601|c1_g1_i17	NT5M	0	61.9552	5.97625	0.0472724
TR126397|c0_g1_i1	PARD6A	53.311	2184.57	5.33062	0.0239095
TR149782|c1_g2_i1	ATP13A2	53.3674	3540.39	6.02543	0.0107043
TR126254|c0_g1_i1	LZTFL1	30.868	0	-4.99404	0.0277297
TR96161|c0_g1_i1	CCDC177	7796.2	18.0008	-8.68075	0.000662117
TR154518|c0_g1_i2	PRDM8	1.63143	118.333	5.50301	0.0499101
TR84514|c0_g1_i3	DYRK4	5569.2	9.15211	-9.0998	0.00285554
TR97527|c1_g5_i5	KCNQ5	11.1106	360.538	4.89981	0.0478293
TR126871|c0_g1_i1	DUOX1	58.9997	2185.78	5.18771	0.0237056
TR154917|c0_g1_i1	TMPRSS4	1.60626	160.359	5.95215	0.0143664
TR91844|c0_g9_i1	AGPAT4	0	312.343	8.2916	0.00039401
TR67744|c0_g1_i1	TOPORS	1692.99	4.31989	-8.31481	0.000986881
TR108459|c0_g11_i3	SLC7A10	0.51752	61.871	5.37261	0.0419763
TR166321|c0_g1_i2	KCND1	1250.5	5.97204	-7.48786	0.045147
TR130598|c0_g1_i7	ATP8A2	326.786	4.50068	-5.897	0.019461
TR167220|c2_g2_i2	ANKEF1	6780.89	105.991	-5.98612	0.0262051
TR91542|c1_g1_i1	MDN1	48.0868	0	-5.61726	0.0111748
TR164814|c0_g2_i1	SERTAD4	36.5906	0	-5.2323	0.0194218
TR109220|c5_g5_i5	AIG1	940.216	15.2112	-5.85946	0.0172651
TR113641|c0_g2_i1	C14orf119	43.3871	0	-5.47207	0.0204902
TR141266|c0_g2_i1	MS4A12	38.2989	1643.41	5.38694	0.0235393
TR113959|c0_g1_i1	KLHL28	816.898	5.05022	-7.07879	0.00473291
TR90528|c0_g1_i1	SCN3B	111.713	5242.03	5.53968	0.0205528
TR154381|c0_g1_i1	PLA2G3	15.5132	4192.49	7.98839	0.00117128
TR89978|c0_g2_i4	FMN2	50.5153	1638.37	4.992	0.0338955
TR126575|c0_g1_i1	GLTP	175.141	6166.1	5.12979	0.0353831
TR115322|c1_g1_i1	GLTSCR2	127.59	0	-7.00663	0.00854141
TR129665|c0_g1_i1	BFAR	3067.55	2.17438	-9.91687	0.000230892
TR53472|c0_g1_i1	KCND2	1204.07	13.0839	-6.41893	0.0136481
TR114301|c0_g1_i1	FRRS1L	7.35133	274.35	5.04311	0.0252739
TR113355|c0_g1_i1	CAMSAP3	56.2473	2108.86	5.20379	0.033175
TR174812|c10_g5_i4	POGK	421.726	7.05844	-5.71308	0.0146897
TR131793|c2_g1_i1	CCDC88C	9.86747	1772.81	7.35069	0.00242105
TR149536|c1_g1_i5	PAK7	1552.64	21.6398	-6.10065	0.00948523
TR175132|c0_g1_i3	PTCHD2	28.3892	917.059	4.96523	0.0488445
TR168669|c0_g1_i2	LRP2BP	3588.13	36.1555	-6.59392	0.00718504
TR144859|c20_g2_i2	NYNRIN	14899	69.4363	-7.72478	0.0017372
TR109751|c3_g1_i7	RERE	1.08807	431.881	7.69566	0.00138007
TR120808|c0_g1_i2	SLC17A6	2.32918	126.32	5.25714	0.0171278
TR130370|c0_g3_i1	RHOC	66.3262	0	-6.0731	0.00509793
TR103184|c4_g7_i7	CHRNA9	487.511	3.29916	-6.82819	0.00315137
TR153640|c0_g1_i1	CYP26A1	2.66647	3819.32	10.0251	0.00022184
TR169441|c0_g1_i1	Mid2	3710.55	89.6617	-5.35539	0.0420329
TR131945|c0_g1_i1	Ptf1a	0.284937	173.019	7.08141	0.0022194
TR90873|c0_g3_i1	Kif21b	15.3575	1684.25	6.68687	0.00495727
TR174158|c1_g1_i1	Fscn3	16740.7	13.9495	-10.1291	0.000230584
TR148003|c0_g1_i2	Dkkl1	7233.07	62.8506	-6.82396	0.00597955
TR126774|c0_g1_i1	Plk3	233.895	14921.6	5.98934	0.0111467
TR109656|c4_g1_i1	Amfr	63.1391	0.259138	-5.6707	0.0247394
TR90086|c0_g1_i1	Tmed2	0.284937	51.9799	5.36567	0.0214927
TR90833|c1_g2_i1	Mmp17	0.284937	72.0763	5.82963	0.0109659
TR114202|c1_g1_i1	Oaz3	60064.5	63.0278	-9.87362	0.00239712
TR102401|c0_g1_i3	Lhx6	1.06155	168.512	6.36151	0.00544874
TR138483|c5_g1_i2	Trim3	0.569874	192.382	6.94466	0.0030901
TR174053|c0_g1_i1	Fzd9	90.1952	2666.53	4.8704	0.0462275
TR114383|c0_g1_i1	HSFX1	3000.68	3.50766	-9.37918	0.000300833
TR174765|c1_g1_i1	ARPP21	175.197	0	-7.46105	0.00104143
TR114526|c1_g1_i2	ZMYM2	7564.27	52.3672	-7.14729	0.00287888
TR96319|c1_g4_i8	EPHA6	1.08739	97.3013	5.55744	0.0155633
TR137965|c0_g1_i2	FAM198A	96.6219	1.11251	-5.53017	0.025803
TR169450|c0_g1_i1	OR5V1	44.6374	0	-5.51214	0.0309165
TR89431|c1_g1_i2	DMBT1	1221.68	15.9696	-6.17095	0.011842
TR41650|c0_g1_i1	IL20RA	31.2597	1326.01	5.36231	0.0277131
TR130926|c0_g1_i1	IL17B	0.284937	123.974	6.60379	0.0189102
TR144707|c0_g3_i1	SFMBT1	0	28.8185	4.89814	0.0317606
TR130069|c0_g1_i1	CTNNA3	0	129.995	7.03337	0.00258529
TR121362|c42_g40_i1	ZMYM5	85.6419	0	-6.43699	0.00410314
TR138459|c0_g1_i1	SALL4	47.7052	7521.87	7.27106	0.00267045
TR95963|c0_g1_i2	TSKS	3622.99	46.7741	-6.2452	0.0359777
TR126257|c0_g2_i4	LEF1	49.6984	2121.16	5.38745	0.0277947
TR87982|c0_g1_i1	ZNF180	0.518195	58.5176	5.29289	0.0303246
TR102939|c1_g1_i1	OSGIN1	53.1422	10136.5	7.54873	0.00194274
TR138513|c0_g1_i3	SLC13A4	13446.8	24.935	-9.01825	0.000404838
TR102170|c0_g1_i9	TSPAN16	1065.34	2.09842	-8.42691	0.000580037
TR109656|c4_g2_i1	AMFR	195.485	0.259138	-7.28584	0.00195695
TR91187|c0_g1_i5	TCFL5	3104.01	97.5869	-4.97706	0.0414897
TR84306|c0_g1_i1	ACSL5	46.8634	43176.9	9.81715	0.000230584
TR20557|c0_g1_i1	ZNF777	1.03504	65.4724	5.02963	0.0251985
TR84809|c0_g2_i2	FAM184B	15.6642	684.459	5.36224	0.0217406
TR144346|c0_g1_i1	NWD2	5.62125	342.314	5.69628	0.0214104
TR138714|c0_g2_i1	KIF26A	0	35.9406	5.20714	0.023592
TR146600|c0_g1_i1	SHROOM4	67.0622	4338.39	5.99449	0.0103124
TR144872|c3_g4_i1	MYO5B	27.5467	7187.62	7.97625	0.000974938
TR118639|c0_g1_i4	RNF112	27.4555	0	-4.83063	0.030753
TR160067|c0_g1_i3	STAP1	1077.31	5.57127	-7.35839	0.00236849
TR167838|c0_g1_i1	ALK	7.40504	869.358	6.69421	0.00427056
TR91269|c0_g28_i1	CDC14A	52.4089	0	-5.73901	0.0242914
TR125607|c0_g1_i3	PLA2G4C	56.6131	0.518276	-5.24589	0.0277725
TR287977|c0_g1_i1	BSN	1762.03	11.1781	-7.17762	0.00406596
TR162966|c2_g2_i1	IGSF9B	0.518195	76.9493	5.68211	0.0160655
TR155438|c1_g1_i8	SHANK2	46.1704	2836.95	5.91082	0.011805
TR144223|c3_g5_i8	SLC7A11	273.314	0	-8.09968	0.000407986
TR95847|c0_g1_i1	CLCA2	0.284937	51.3987	5.34976	0.0234619
TR135311|c0_g1_i1	TNN	295.533	0	-8.21205	0.000390505
TR154560|c1_g1_i4	LAMP3	636.814	19.9726	-4.92656	0.0369792
TR136974|c1_g1_i1	RBPMS	267.533	15901.2	5.88799	0.0129536
TR126196|c0_g1_i1	vex1	3.26353	1482.09	8.44234	0.000654526
TR184520|c0_g1_i1	SOX14	0	29.8432	4.94688	0.0365907
TR97390|c2_g1_i1	Trib3	32.1329	1602.73	5.59702	0.0179235
TR136886|c0_g1_i1	Psmd9	542.49	0	-9.08611	0.00189087
TR121109|c3_g1_i1	Egr4	6.68348	6420.67	9.70697	0.000263724
TR89452|c0_g2_i1	Phlda3	18.6307	2392.03	6.92958	0.0020215
TR146820|c0_g1_i1	Ca14	64.3773	1.23555	-4.87009	0.0463519
TR119700|c0_g1_i1	CHGA	0.284937	53.8979	5.41698	0.0217299
TR149466|c1_g1_i2	APOBEC2	1650.97	35.0532	-5.51791	0.017536
TR138654|c0_g2_i3	B3GNT3	20.9965	2202.66	6.64649	0.00425877
TR86438|c0_g1_i1	TP53TG5	2700.9	5.86878	-8.61971	0.000658924
TR91378|c2_g1_i8	RPH3A	44.7702	2906.32	5.98914	0.0104595
TR117708|c0_g1_i1	SLC27A6	2875.1	82.0553	-5.1139	0.0431604
TR154140|c0_g1_i1	ZNF256	37.9357	1180.57	4.92346	0.0425686
TR95886|c0_g4_i1	AXIN2	39.7786	1406.04	5.1087	0.0359657
TR165802|c0_g1_i1	GPR55	0	39.9634	5.35626	0.0239316
TR120186|c0_g2_i5	SNX24	255.166	0	-8.00094	0.0357631
TR109139|c1_g1_i2	SLC6A5	1.34717	585.956	7.96619	0.0310616
TR162844|c0_g1_i2	STARD10	272.646	10112.4	5.20781	0.0335862
TR126289|c0_g1_i7	ADAM18	138.79	3.37512	-4.99779	0.0380767
TR121282|c2_g13_i1	R3HCC1	0	221.1	7.79507	0.0147283
TR97516|c0_g3_i1	TRRAP	45.33	0	-5.53387	0.015785
TR100944|c0_g1_i1	DAAM1	79.0508	0	-6.32284	0.0042892
TR167290|c0_g1_i1	MYO5A	0	129.29	7.02558	0.00250431
TR135285|c0_g2_i1	RNF115	48.6567	0	-5.63392	0.0108887
TR150587|c0_g1_i2	NEUROG3	0.51752	488.249	8.33271	0.00137874
TR97625|c4_g1_i12	SPO11	316.914	2.24679	-6.61348	0.0062864
TR115609|c1_g4_i1	CD2AP	39.4296	0	-5.33734	0.034471
TR143981|c0_g1_i1	KLF2	40.7395	17580.1	8.71839	0.000555455
TR155861|c0_g1_i1	HS3ST3A1	15.0474	1911.25	6.89679	0.00432827
TR94829|c0_g3_i1	CACNG2	40.9415	0.259138	-5.05787	0.0339814
TR155442|c0_g2_i7	MRVI1	4.97183	350.308	5.87842	0.0128773
TR126305|c0_g1_i1	KCNE3	25.2998	1909.6	6.18283	0.00985538
TR119639|c0_g1_i1	KCNE2	270.44	3.56779	-5.89299	0.0134968
TR126918|c4_g1_i1	TNFRSF11A	35.9935	0	-5.2092	0.0207634
TR97698|c2_g1_i1	FCGBP	22.1933	19101.4	9.68583	0.000243031
TR153591|c0_g1_i3	DUSP10	61.9353	2318.81	5.204	0.0296019
TR126313|c2_g3_i1	lmo3	0	252.912	7.98819	0.000567191
TR162606|c0_g5_i5	FTCD	313.936	3.28689	-6.19898	0.00824391
TR155356|c1_g1_i1	vent1B	26.9033	3016.32	6.75669	0.0041002
TR115410|c0_g2_i1	Celf2	3.13163	156.576	5.25319	0.0177901
TR174841|c5_g20_i3	Nek4	6850.52	10.6175	-9.20398	0.0253472
TR91593|c0_g1_i1	Myo9a	36.9	0	-5.24413	0.0196147
TR103350|c0_g1_i1	Sept3	265.229	0.518276	-7.45409	0.00189087
TR144740|c4_g10_i1	Thbs4	0	193.891	7.60652	0.00083703
TR120674|c7_g1_i2	B3gnt2	74.9613	2848.27	5.22918	0.0377287
TR131020|c0_g2_i2	Htatip2	1.60559	640.691	7.94413	0.0295304
TR117766|c0_g1_i1	Rgcc	12.4843	560.65	5.38032	0.0315412
TR144519|c1_g2_i1	Dnpep	58.3372	0	-5.89086	0.00791294
TR147955|c0_g1_i2	Gfpt2	98.0228	4967.27	5.64884	0.0155029
TR115252|c0_g2_i1	TUBB1	30.0702	2056.69	6.04935	0.0128396
Qvalue: corrected P value.
